# Supplementary material for: National youth sedentary behavior and physical activity daily patterns using latent class analysis applied to accelerometry
Source: PubMed Central journal article supplement (PMC4855777; doi:10.1186/s12966-016-0382-x), 2016-05-03

Title of Paper: Youth Physical Activity and Sedentary Behavior Weekly Patterns Using Accelerometry from a National Sample

Additional File Figures:

Online Figures 1a, b, c: Latent class analysis plotted for weighted average counts per minute per day; NHANES 2003-2006

- Page 2            1a: by age group
- Page 3            1b: by gender
- Page 4            1c: by in or out of school

Online Figures 2a, b, c: Latent class analysis plotted for weighted percent of sedentary activity out of total wearing time per day; NHANES 2003-2006

- Page 5            2a: by age group
- Page 6            2b: by gender
- Page 7            2c: by in or out of school

Online Figures 3a, b, c: Latent class analysis plotted for weighted percent of light activity out of total wearing time per day; NHANES 2003-2006

- Page 8            3a: by age group
- Page 9            3b: by gender
- Page 10           3c: by in or out of school

Online Figures 4a, b, c: Latent class analysis plotted for weighted percent of moderate to vigorous physical activity out of total wearing time per day; NHANES 2003-2006

- Page 11           4a: by age group
- Page 12           4b: by gender
- Page 13           4c: by in or out of school

Online Figures 5a, b, c: Latent class analysis plotted for weighted percent of vigorous physical activity out of total wearing time per day; NHANES 2003-2006

- Page 14           5a: by age group
- Page 15           5b: by gender
- Page 16           5c: by in or out of school

Online Figure 1a: Latent class analysis plotted for weighted average counts per minute per day by age groups; NHANES 2003-2006

**Latent class pattern**

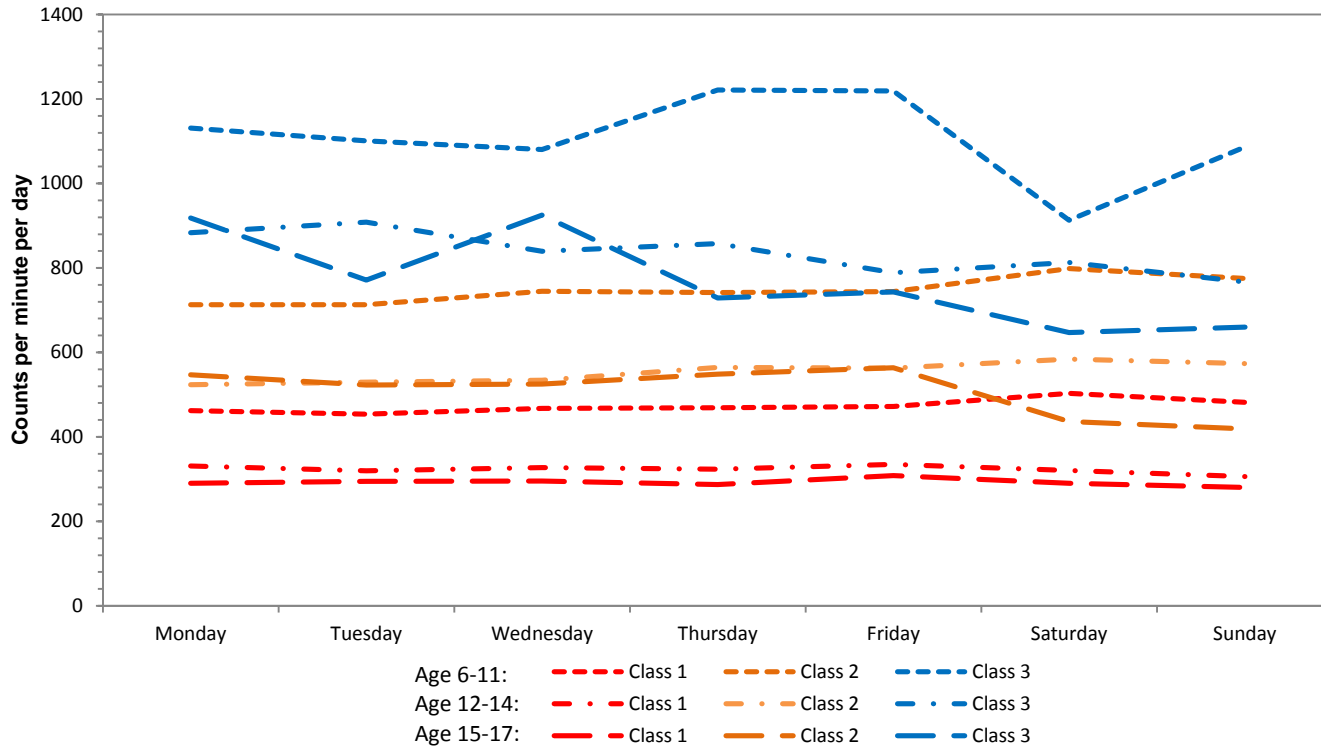

**Weighted %**

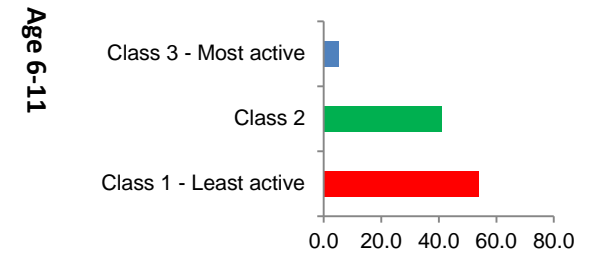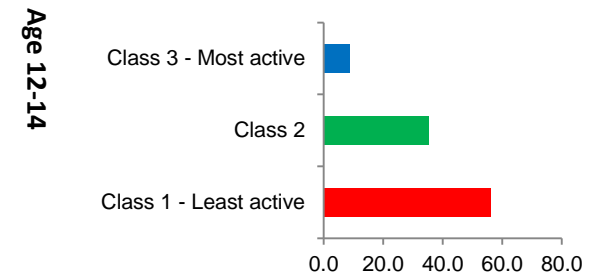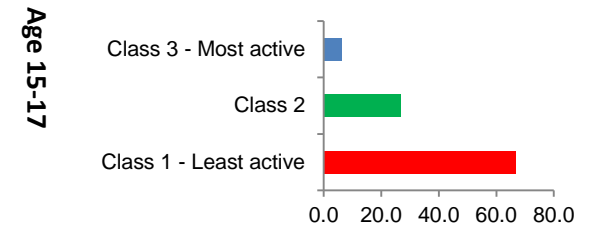

Online Figure 1b: Latent class analysis plotted for weighted average counts per minute per day by gender; NHANES 2003-2006

Latent class pattern

Weighted %

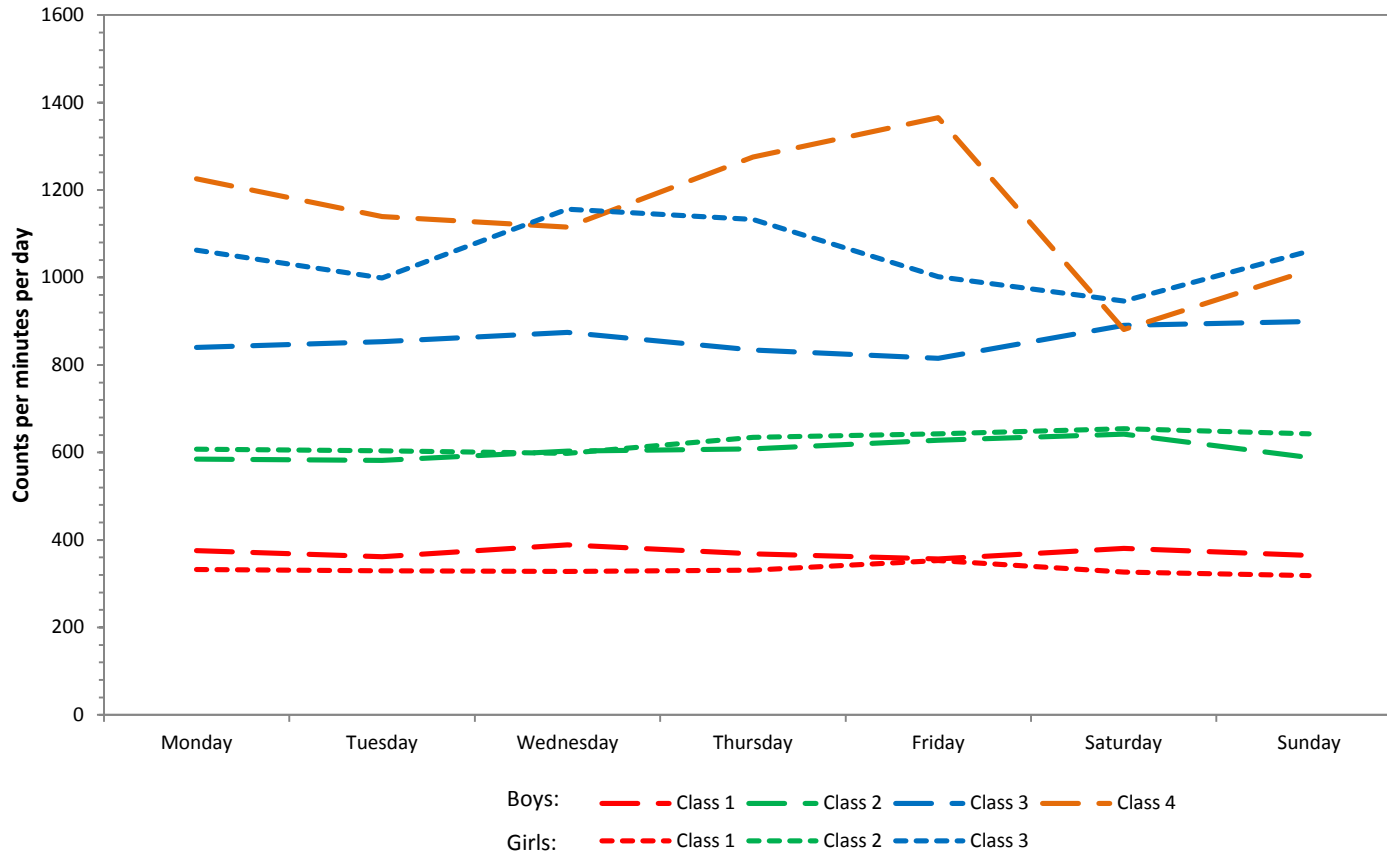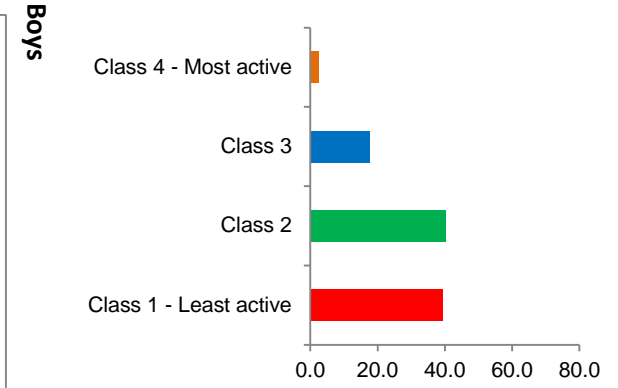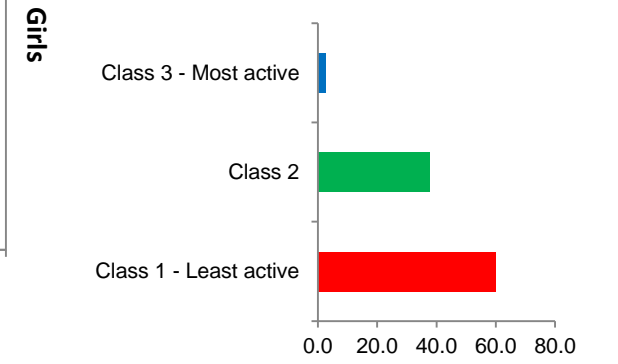

Online Figure 1c: Latent class analysis plotted for weighted mean counts per minute per day by in or out of school; NHANES 2003-2006

**Latent class pattern**

**Weighted %**

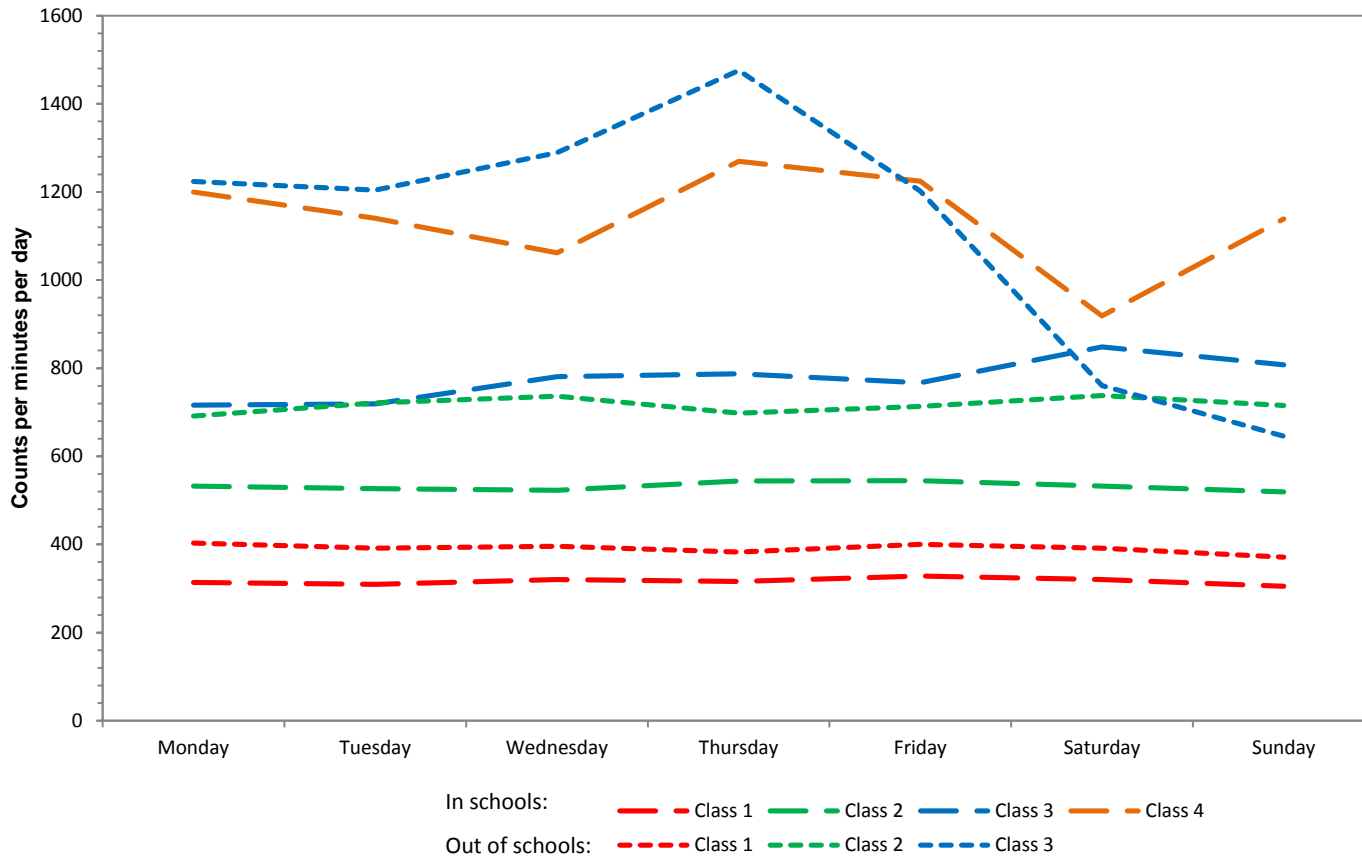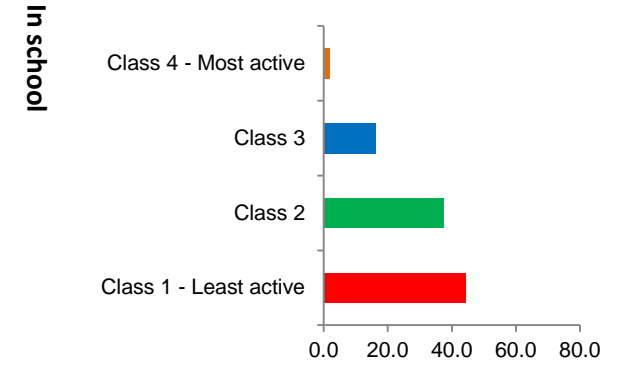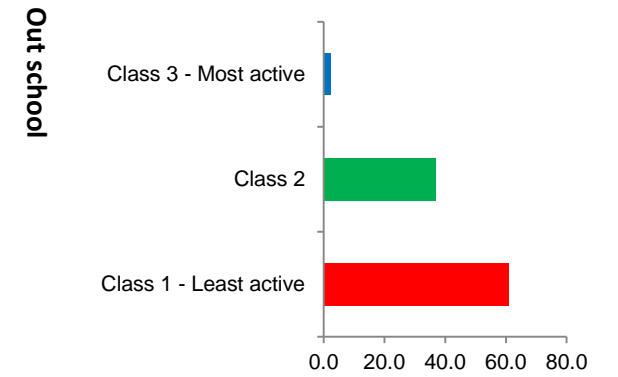

Figure 2a: Latent class analysis plotted for weighted percent of sedentary behavior out of total wearing time per day by age groups; NHANES 2003-2006

**Latent class pattern**

**Weighted %**

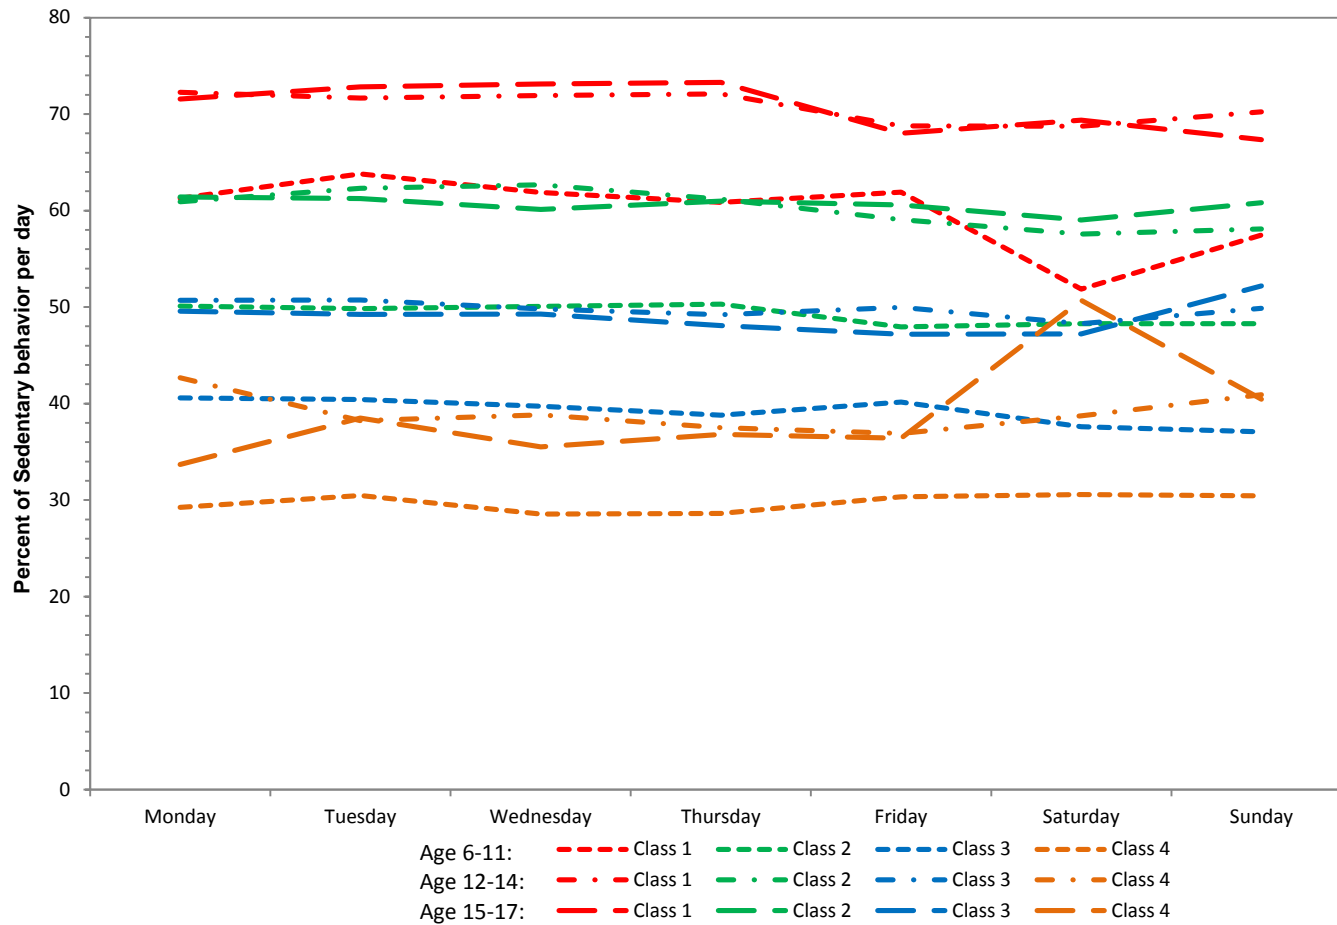

**Age 6-11**

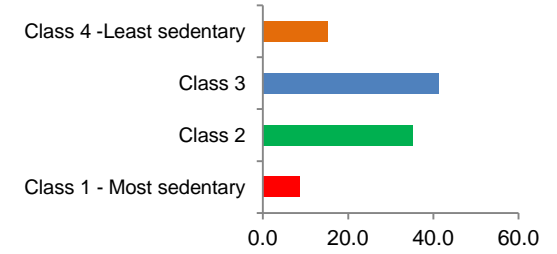

**Age 12-14**

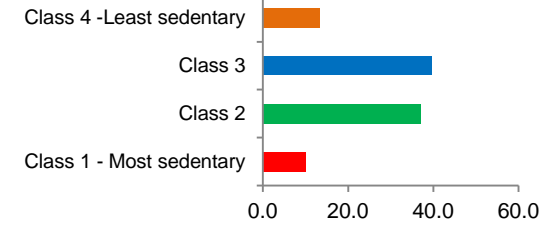

**Age 15-17**

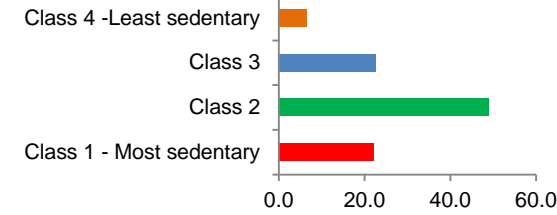

Online Figure 2b: Latent class analysis plotted for weighted percent of sedentary behavior out of total wearing time per day by gender; NHANES 2003-2006

**Latent class pattern**

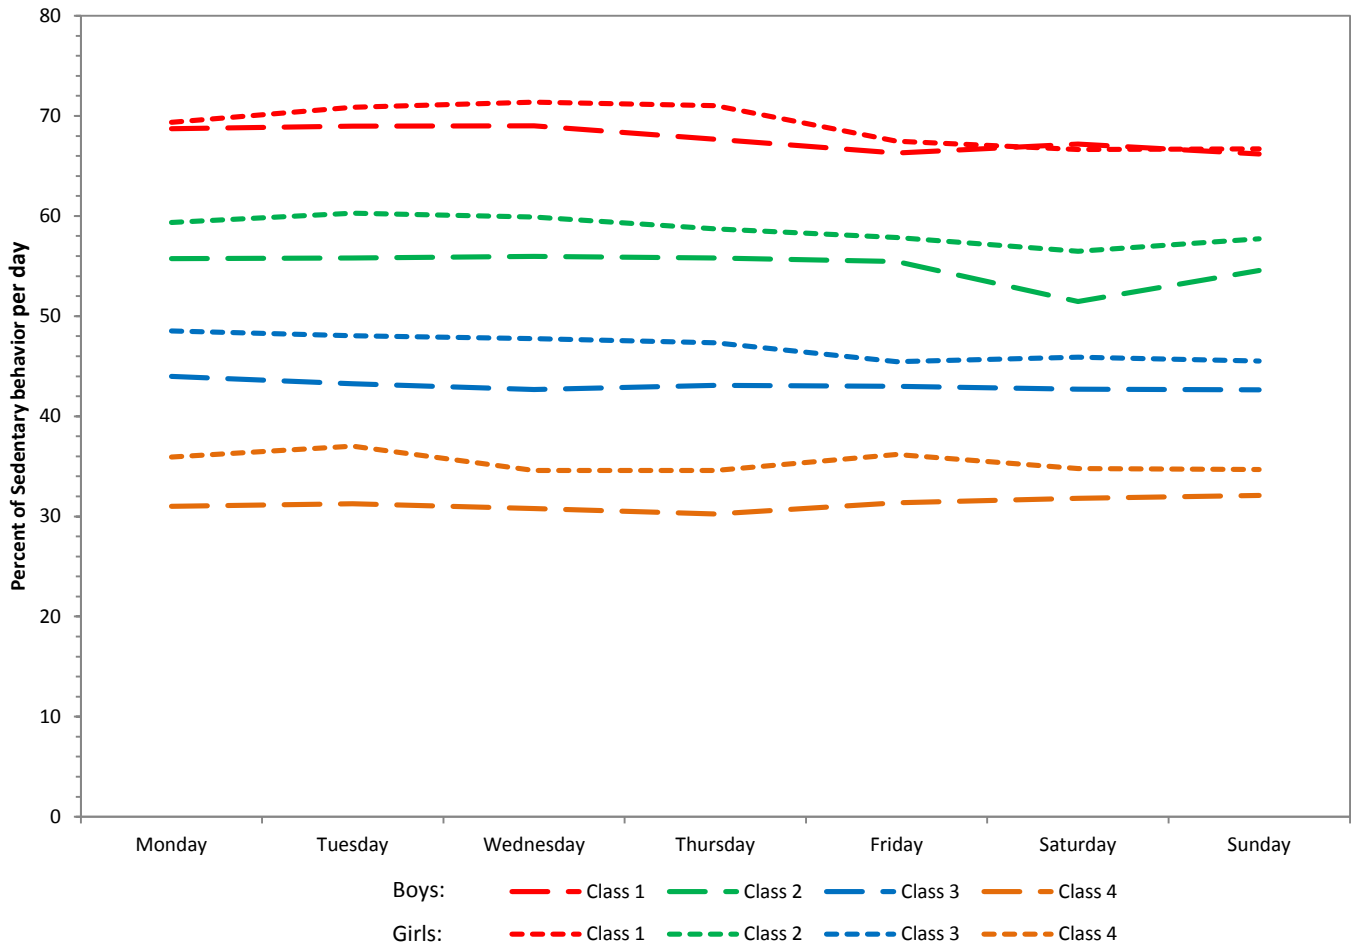

**Weighted %**

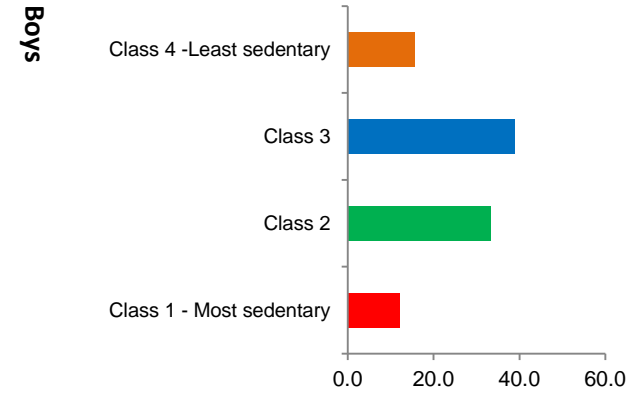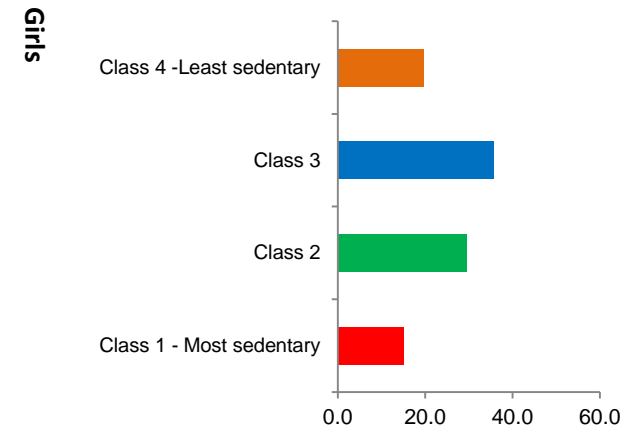

Online Figure 2c: Latent class analysis plotted for weighted percent of sedentary behavior out of total wearing time per day by in or out of school; NHANES 2003-2006

**Latent class pattern**

**Weighted %**

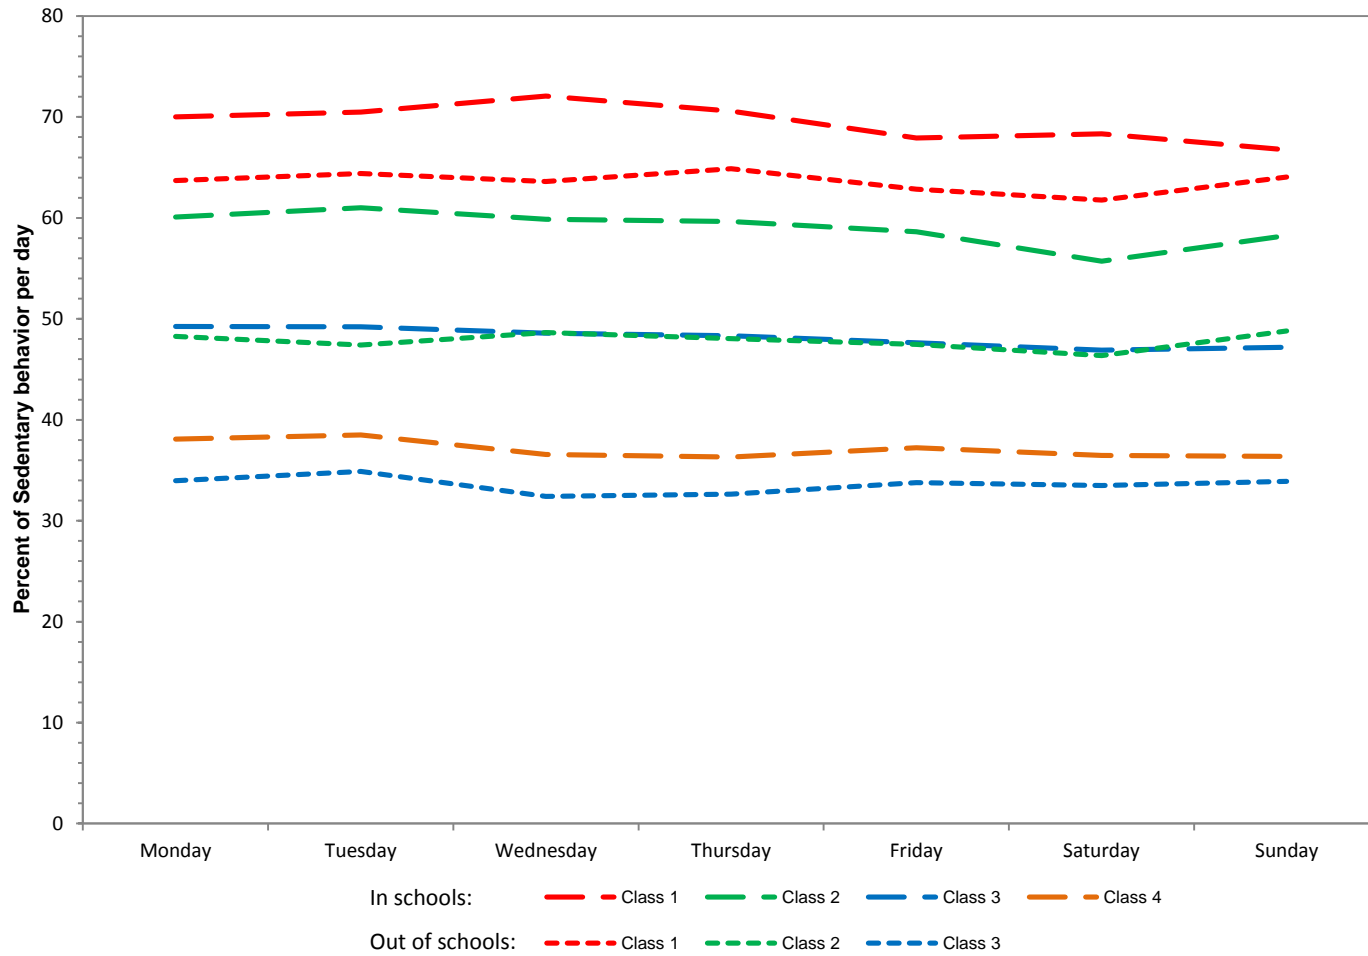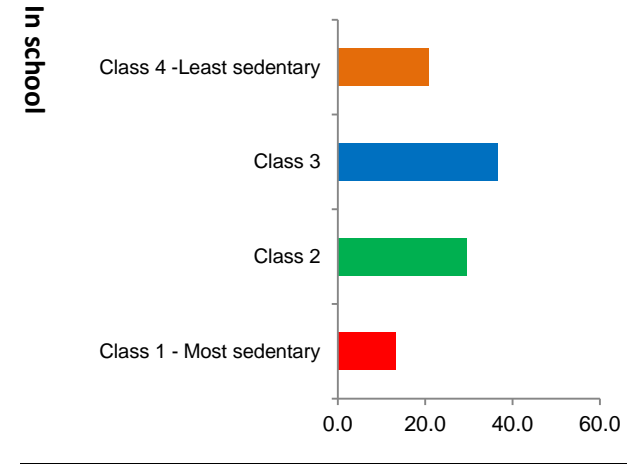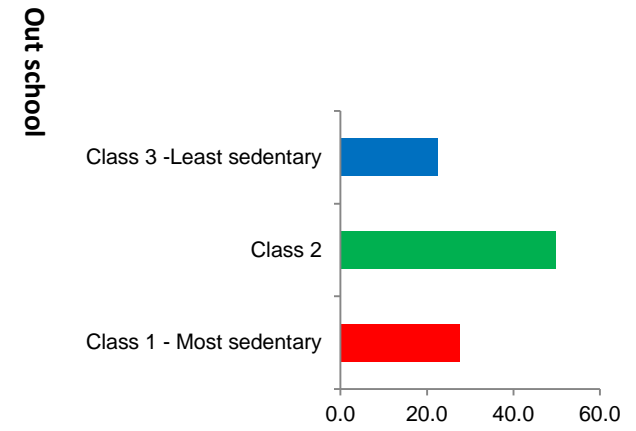

Online Figure 3a: Latent class analysis plotted for weighted percent of light activity out of total wearing time per day by age groups; NHANES 2003-2006

Latent class pattern

Weighted %

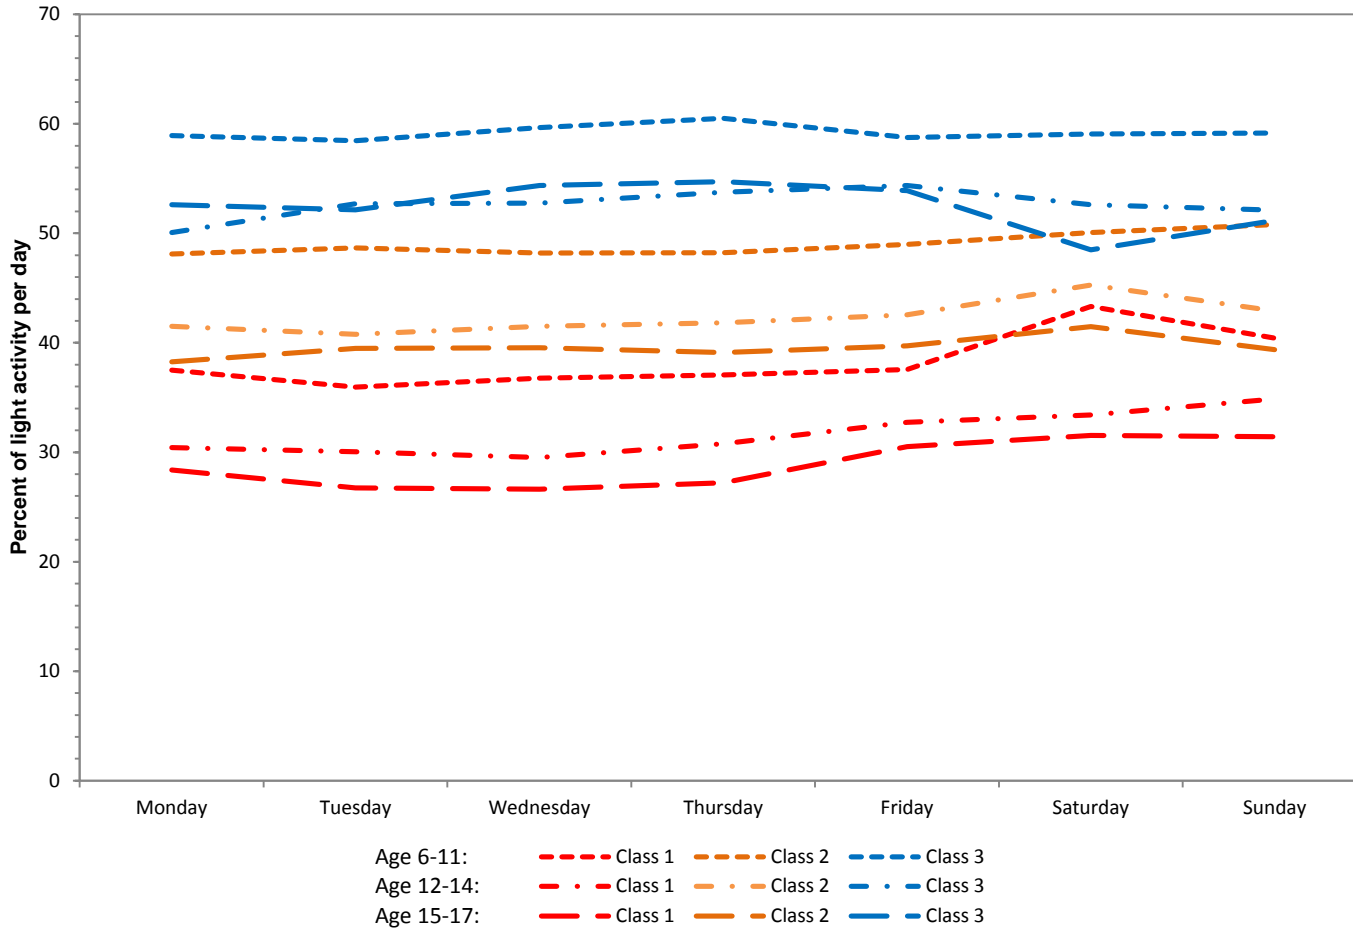

Age 6-11

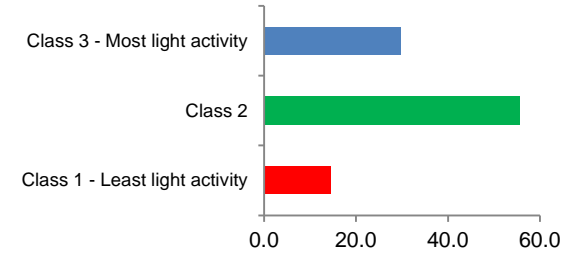

Age 12-14

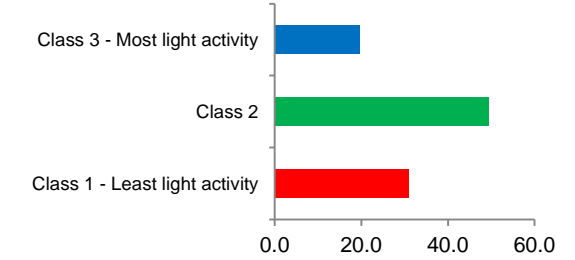

Age 15-17

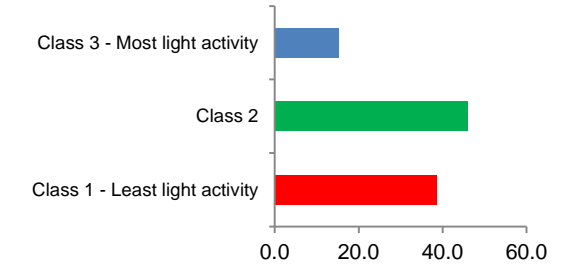



Online Figure 3b: Latent class analysis plotted for weighted percent of light activity out of total wearing time per day by gender; NHANES 2003-2006

**Latent class pattern**

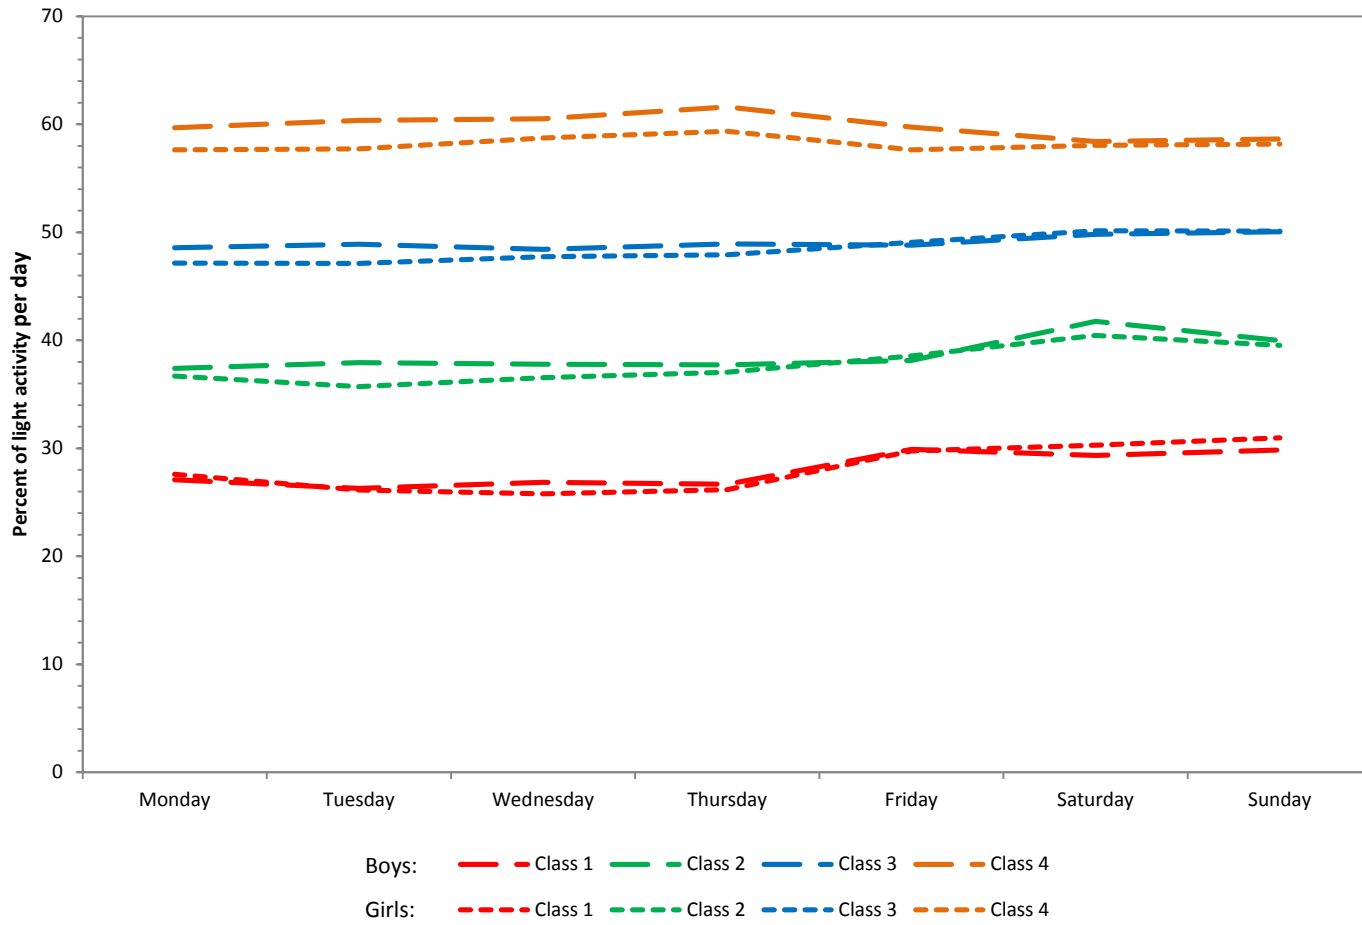

**Weighted %**

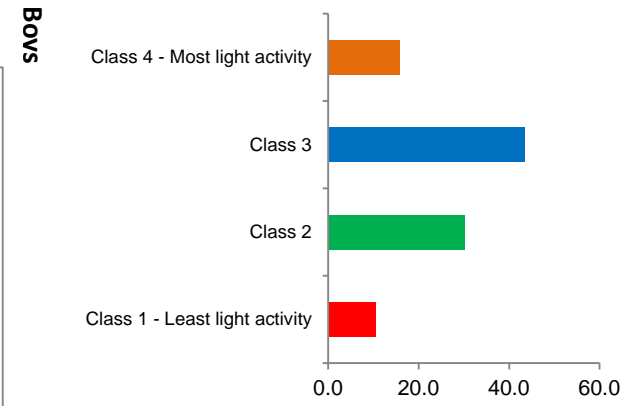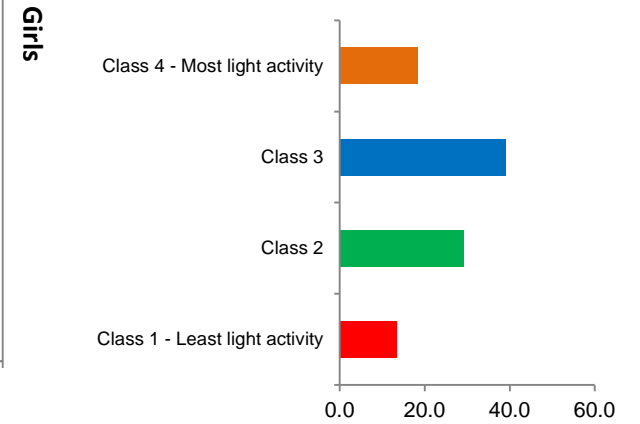

Online Figure 3c: Latent class analysis plotted for weighted percent of light activity out of total wearing time per day by in or out of school; NHANES 2003-2006

**Latent class pattern**

**Weighted %**

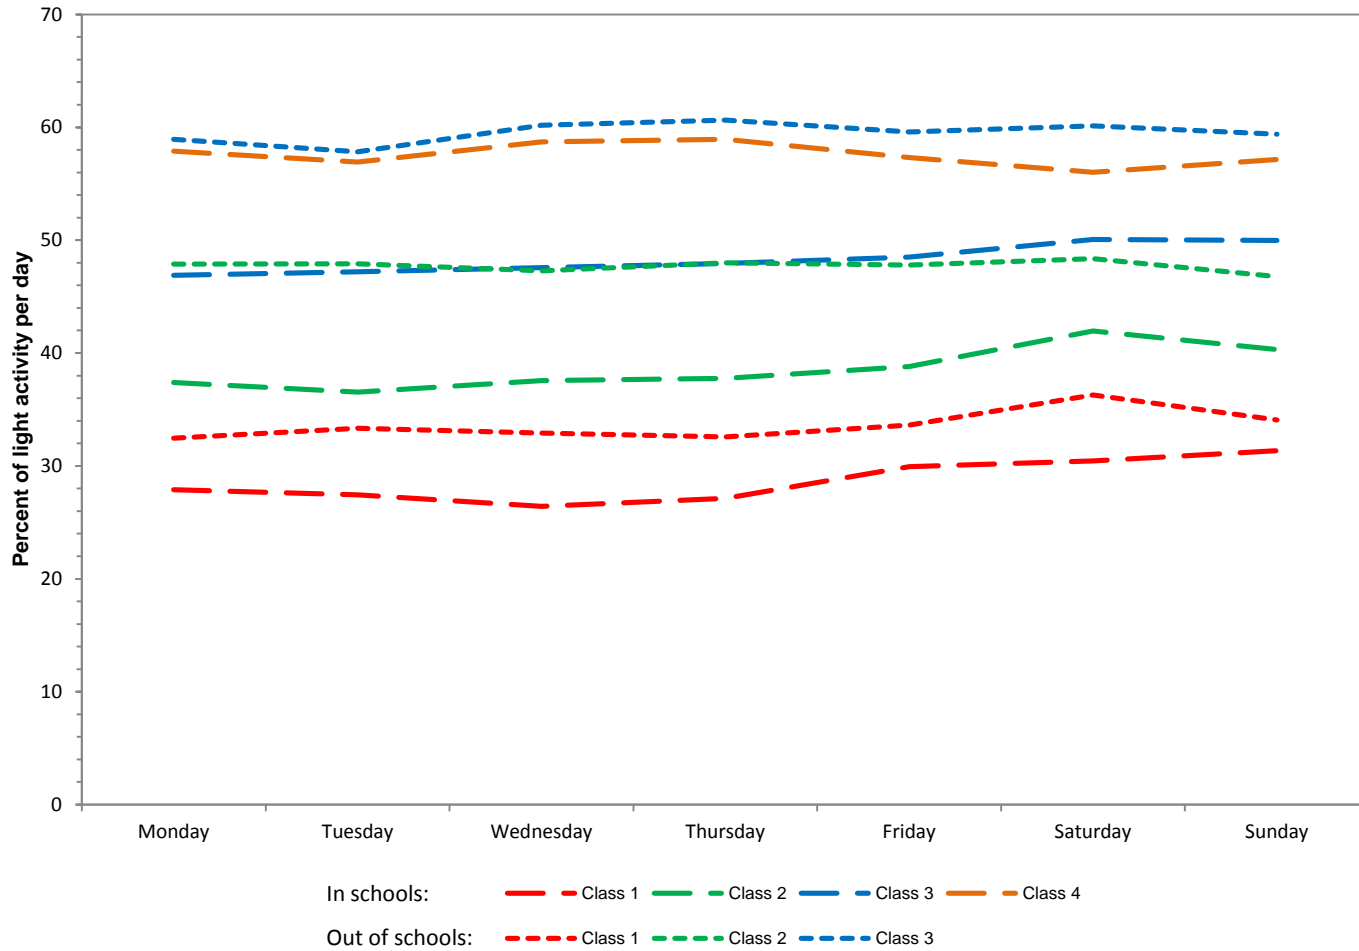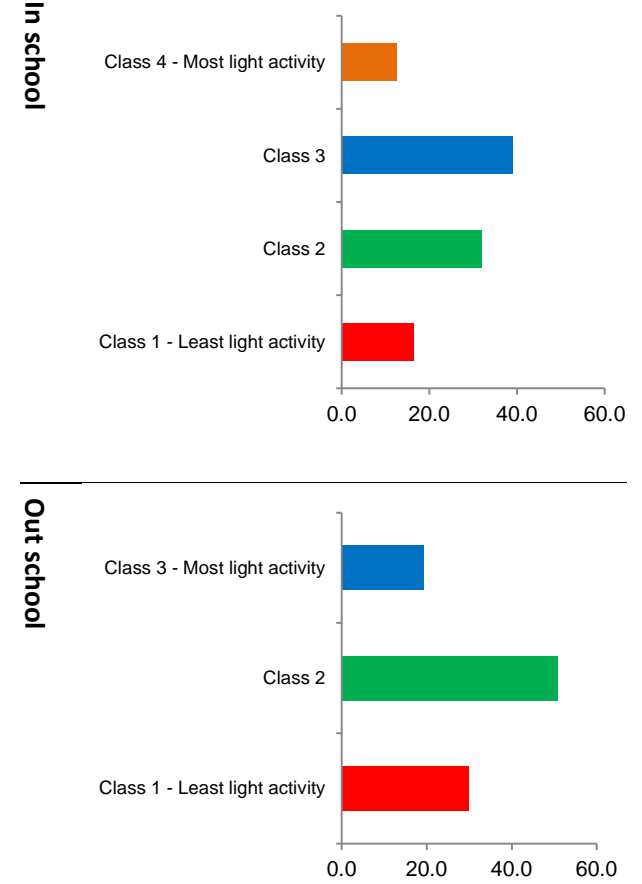

Online Figure 4a: Latent class analysis plotted for weighted percent of moderate to vigorous physical activity out of total wearing time per day by age groups; NHANES 2003-2006

**Latent class pattern**

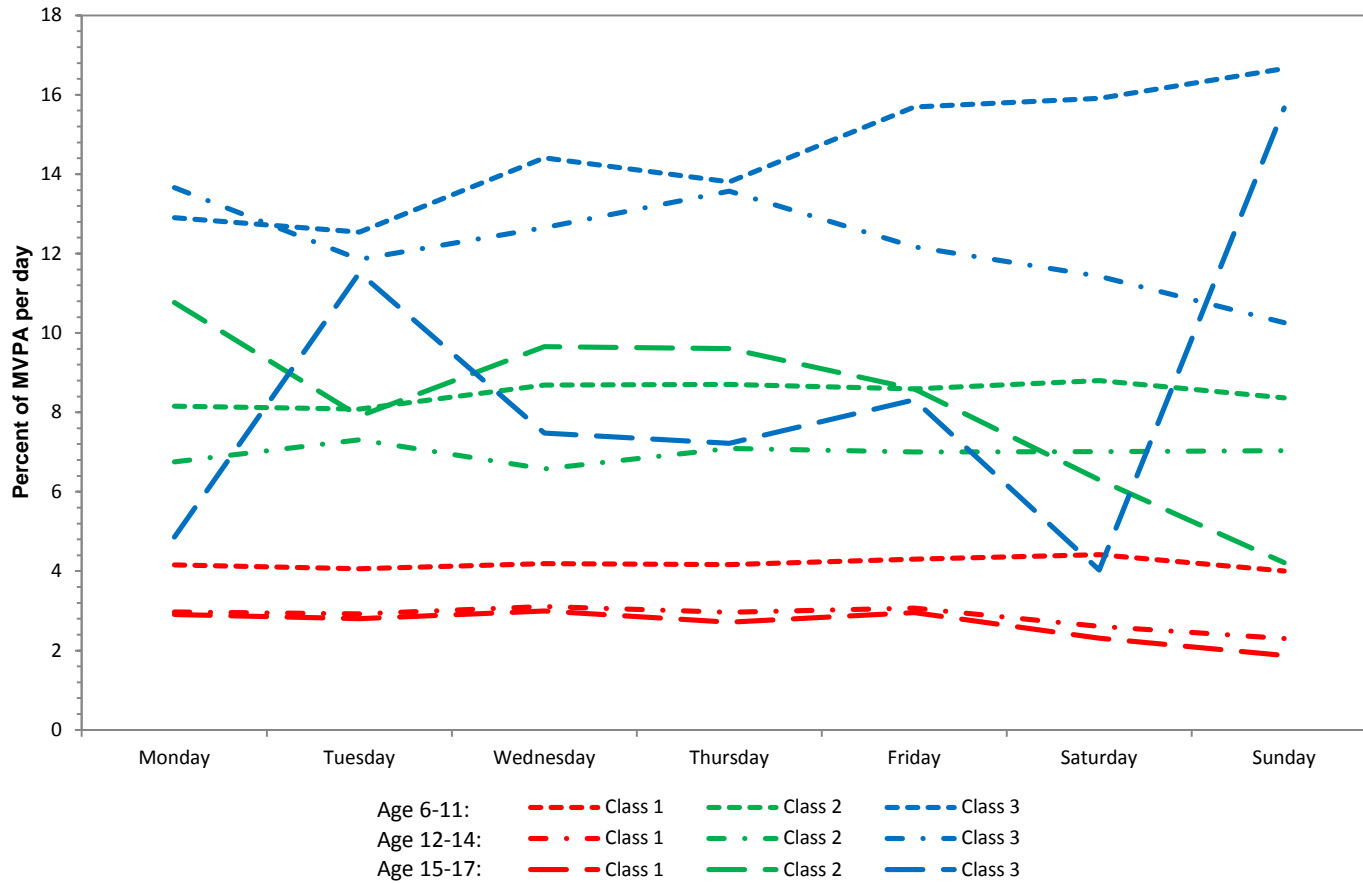

**Weighted %**

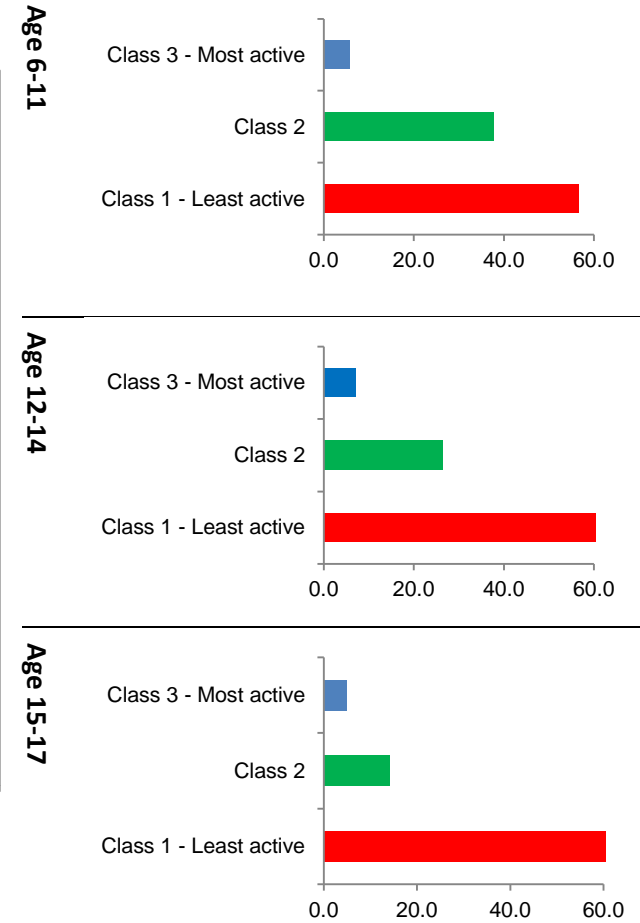

Online Figure 4b: Latent class analysis plotted for weighted percent of moderate to vigorous physical activity out of total wearing time per day by gender; NHANES 2003-2006

**Latent class pattern**

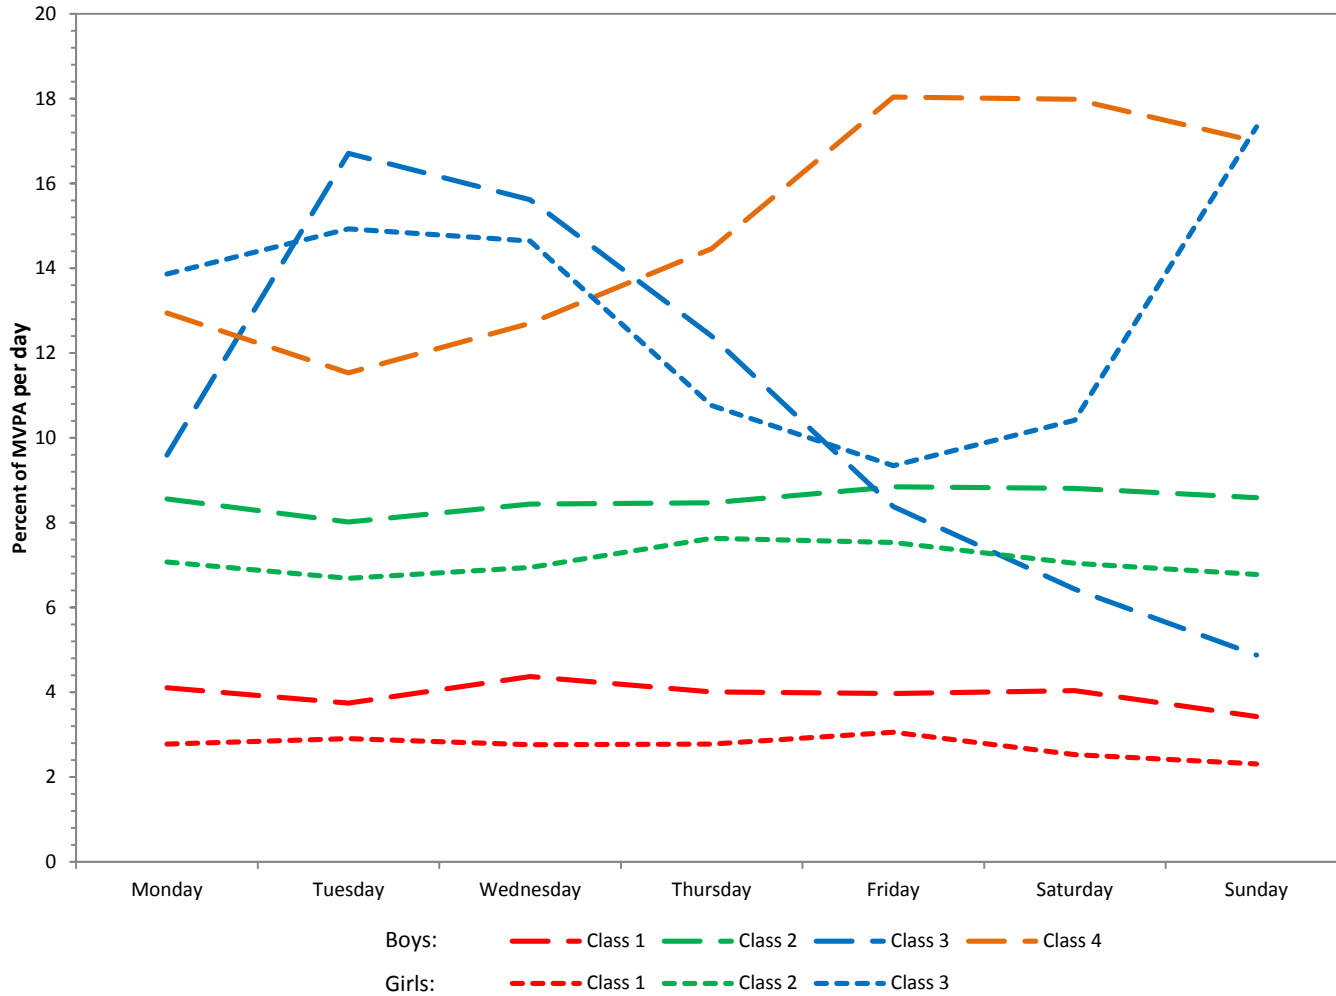

**Weighted %**

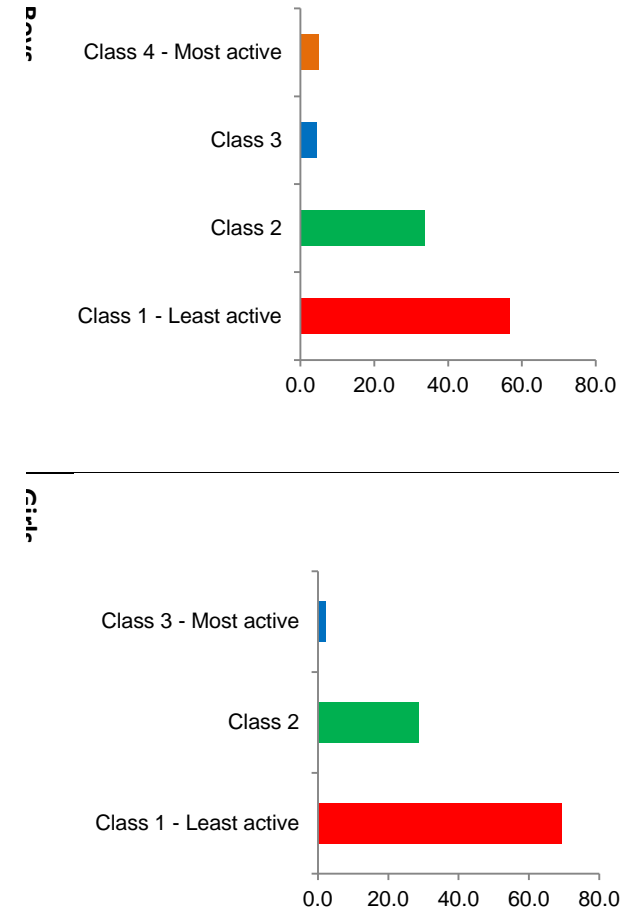

Online Figure 4c: Latent class analysis plotted for weighted percent of moderate to vigorous physical activity out of total wearing time per day by in or out of school; NHANES 2003-2006

**Latent class pattern**

**Weighted %**

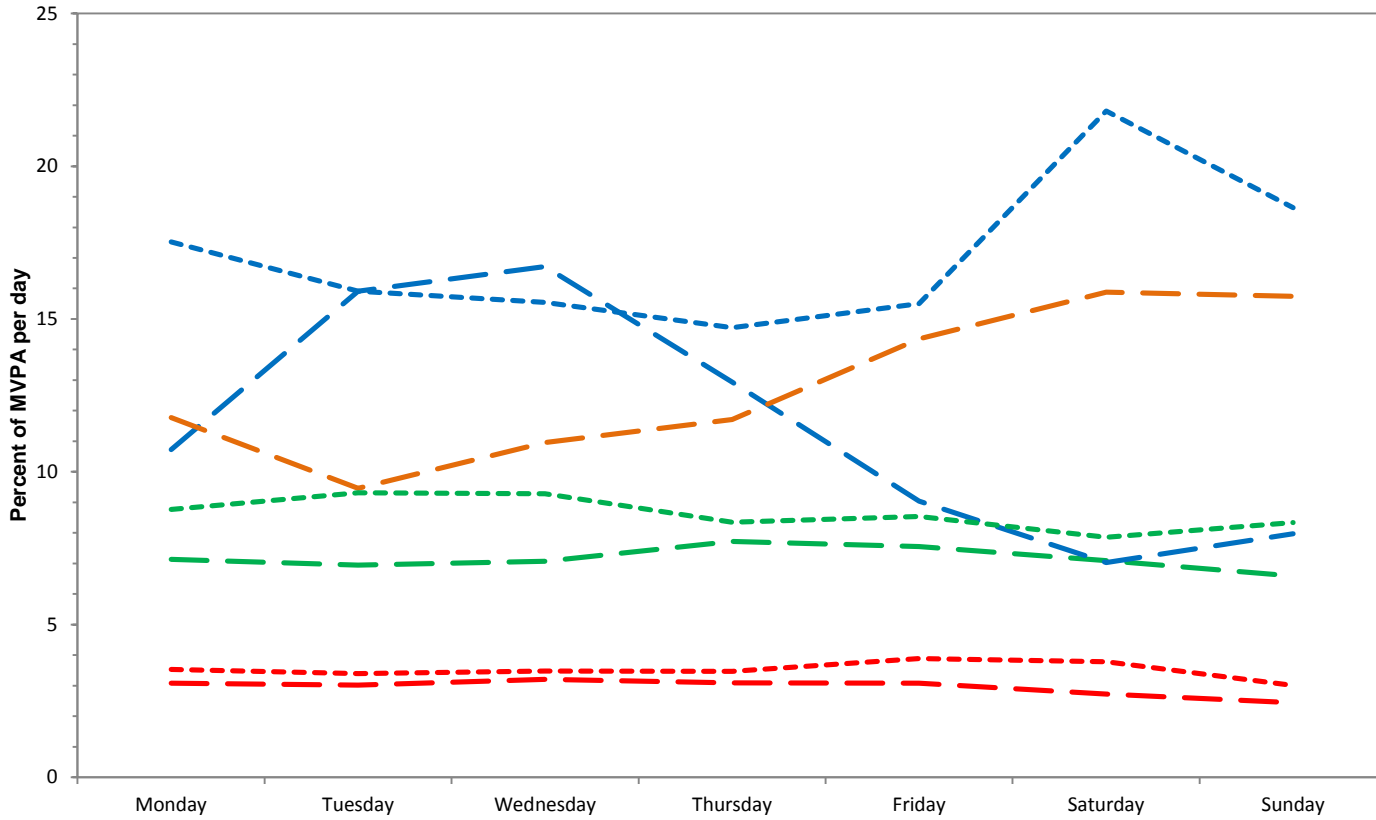

In schools:      — Class 1    — Class 2    — Class 3    — Class 4  
 Out of schools: - - - Class 1    - - - Class 2    - - - Class 3

**In school**

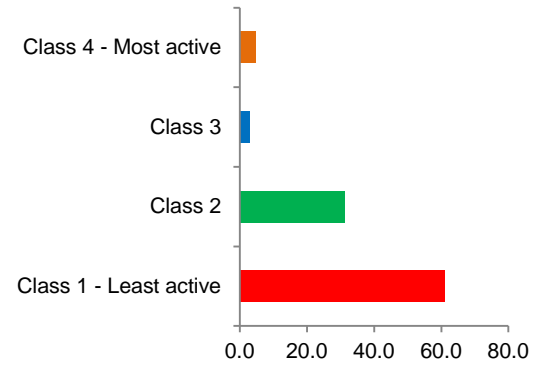

**Out school**

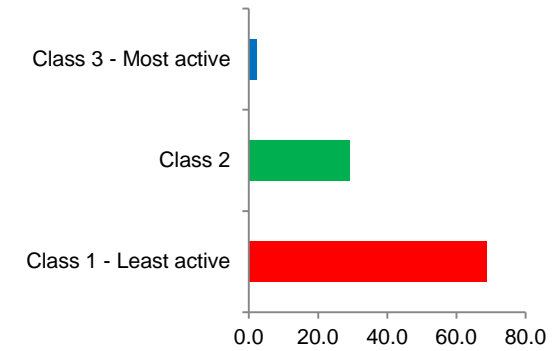

Online Figure 5a: Latent class analysis plotted for weighted percent of vigorous physical activity out of total wearing time per day by age groups; NHANES 2003-2006

**Latent class pattern**

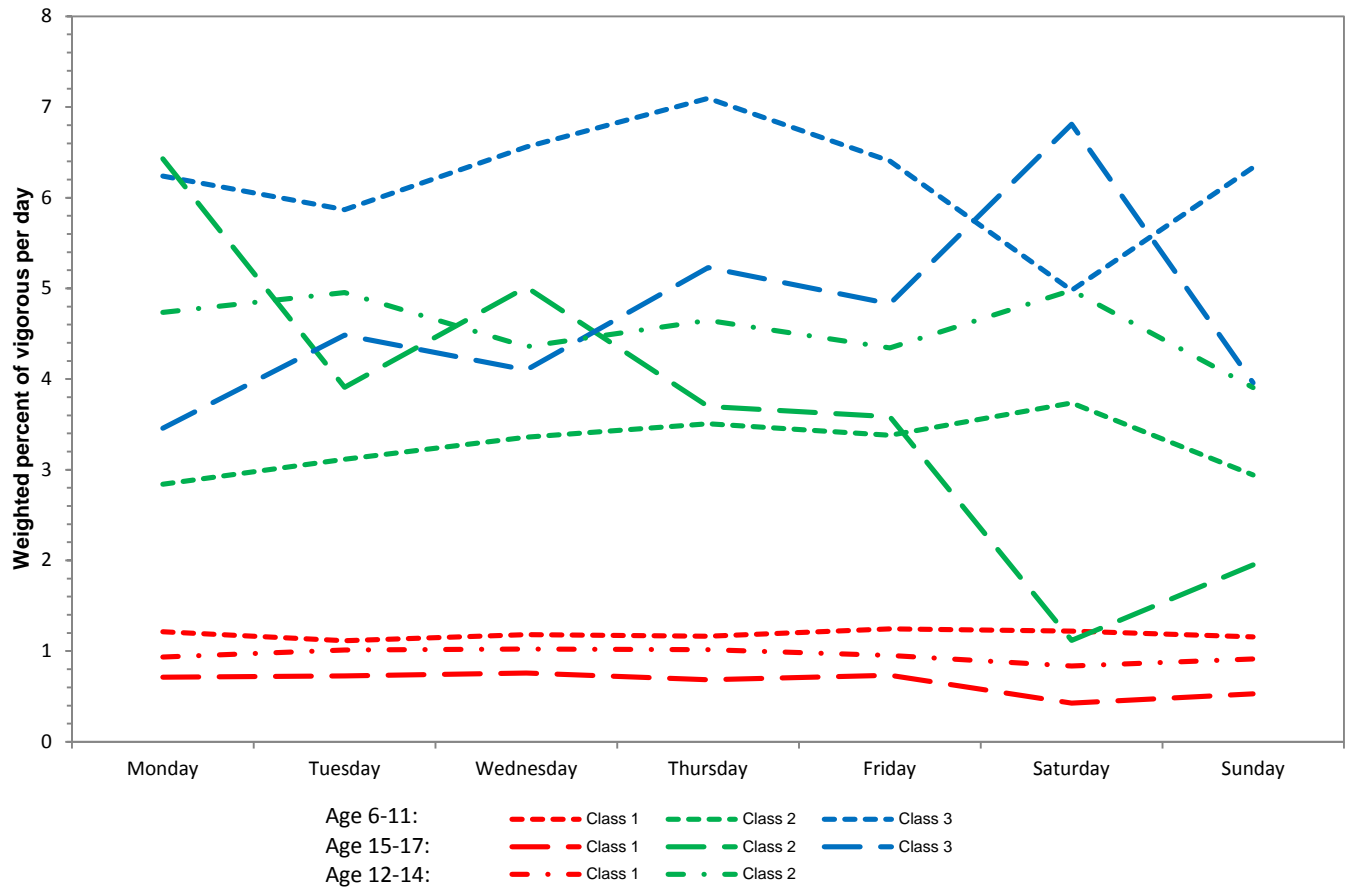

**Weighted %**

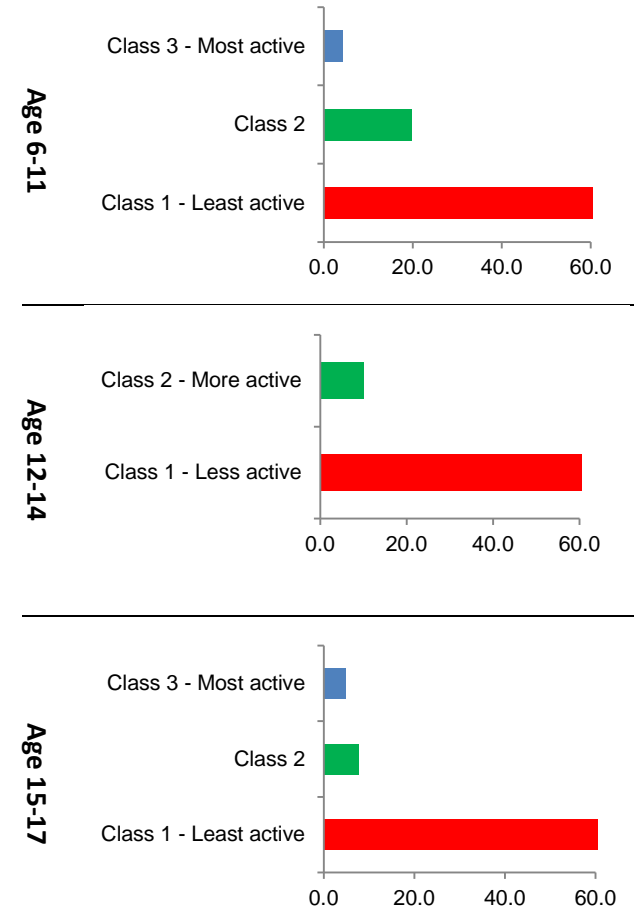

Online Figure 5b: Latent class analysis plotted for weighted percent of vigorous physical activity out of total wearing time per day by gender; NHANES 2003-2006

**Latent class pattern**

**Weighted %**

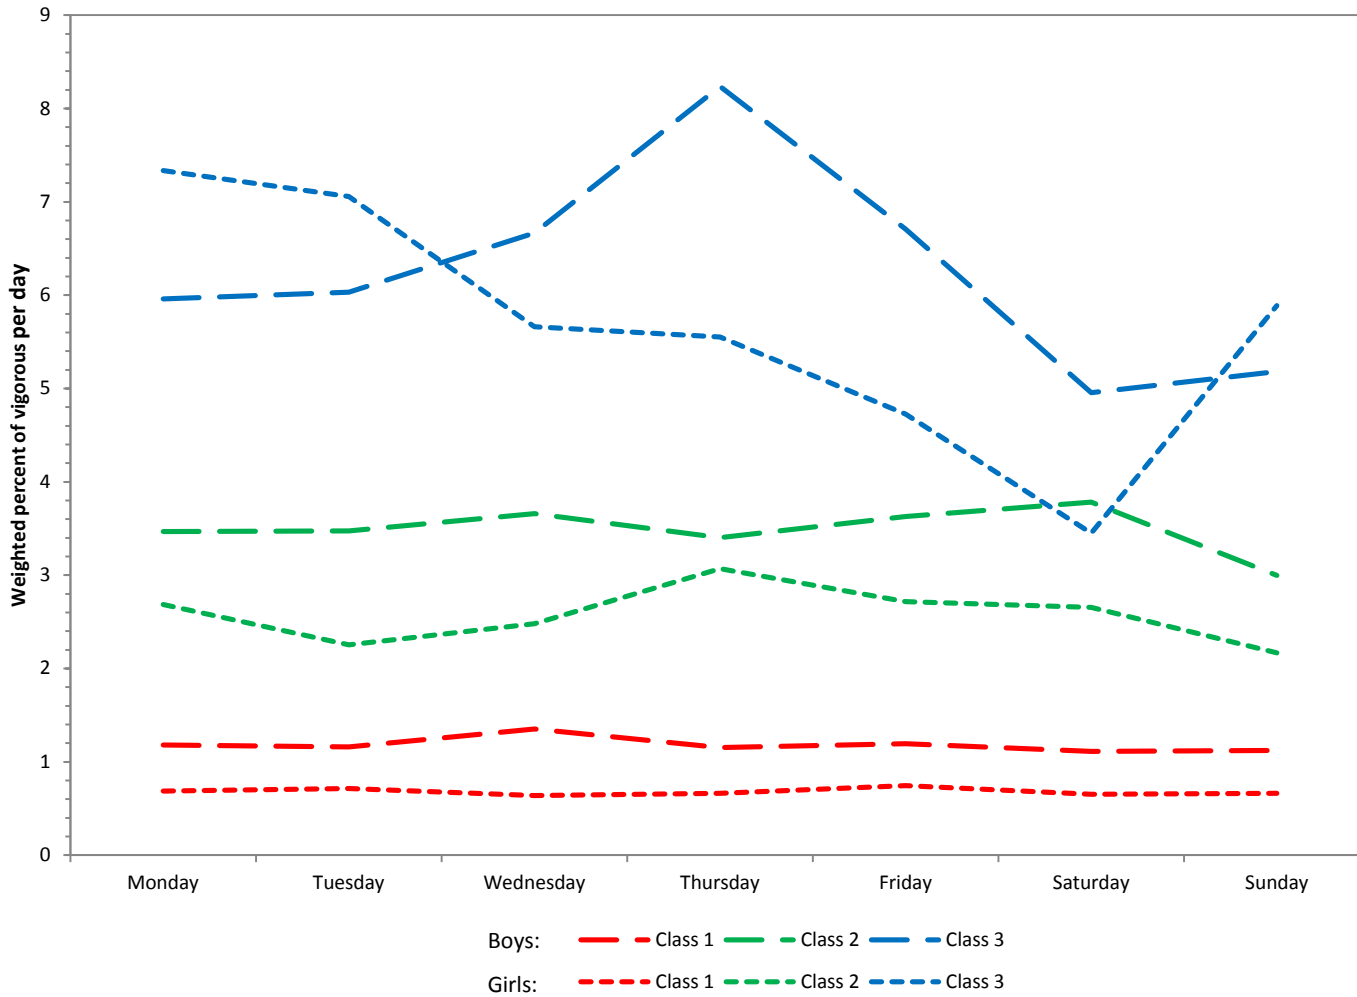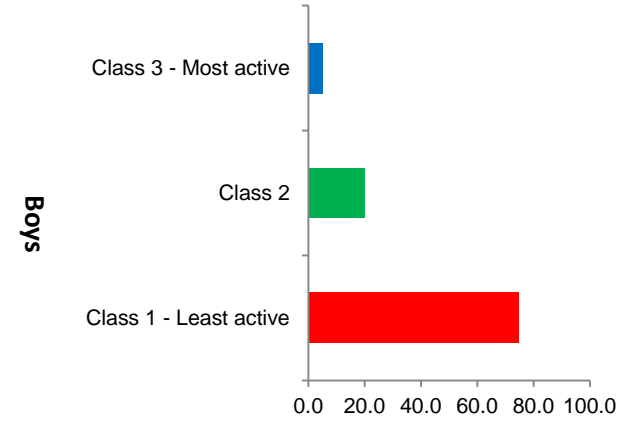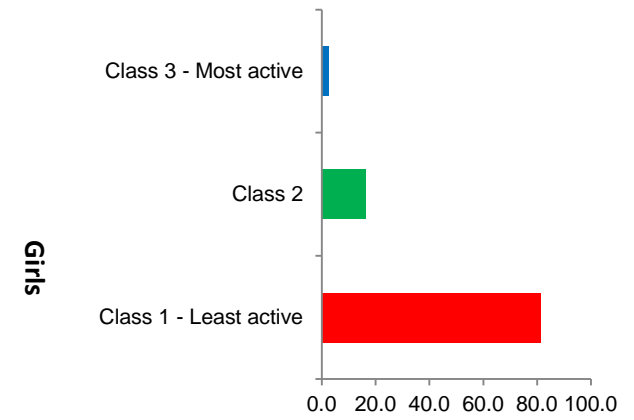

Online Figure 5c: Latent class analysis plotted for weighted percent of vigorous physical activity out of total wearing time per day by in or out of school; NHANES 2003-2006

**Latent class pattern**

**Weighted %**

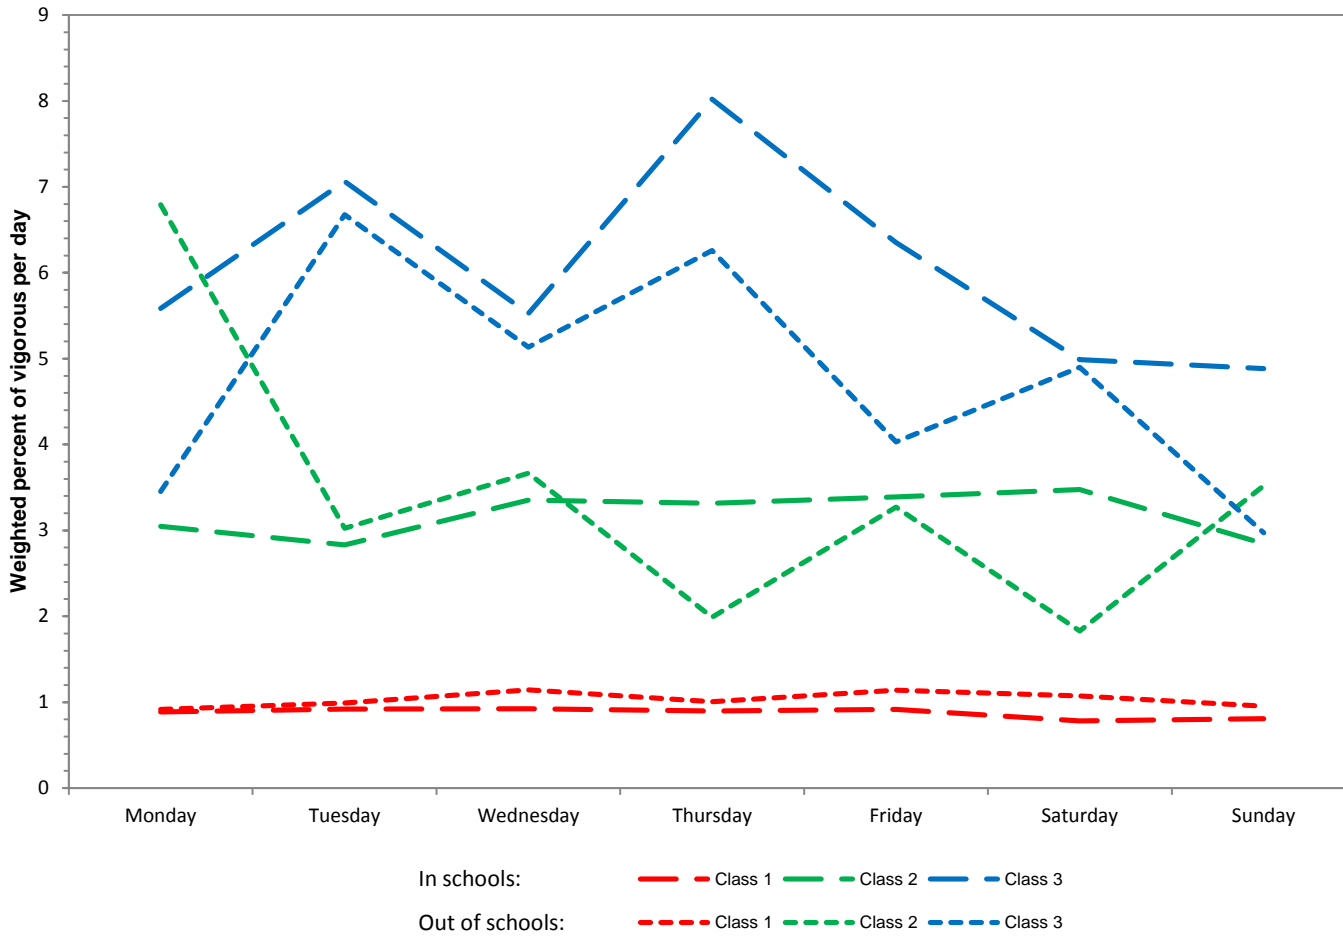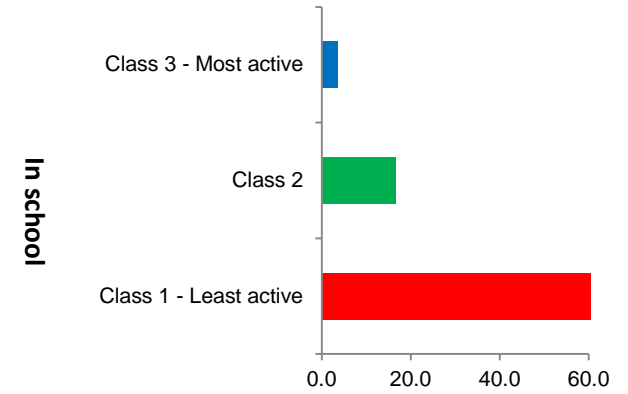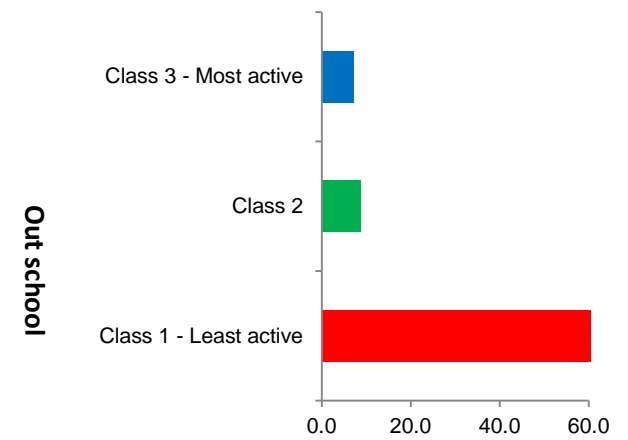

Supplement: 12966_2016_382_MOESM2_ESM.pdf [file 12966_2016_382_MOESM2_ESM.pdf]
