# Supplementary material for: National youth sedentary behavior and physical activity daily patterns using latent class analysis applied to accelerometry
Source: PubMed Central journal article supplement (PMC4855777; doi:10.1186/s12966-016-0382-x), 2016-05-03
Supplement: 12966_2016_382_MOESM1_ESM.pdf [file 12966_2016_382_MOESM1_ESM.pdf]

Online Table 1: Weighted average physical activity and sedentary behavior in counts/minute or percent by day of the week for each latent class derived from accelerometry, overall and by age, gender, and school characteristics, among youth 6-17 years; NHANES 2003-2006

|                                                | n    | Weighted Average Counts/Minute or Percent |                 |         |           |          |        |          |        |
|------------------------------------------------|------|-------------------------------------------|-----------------|---------|-----------|----------|--------|----------|--------|
|                                                |      | Overall                                   | Day of the Week |         |           |          |        |          |        |
|                                                |      |                                           | Monday          | Tuesday | Wednesday | Thursday | Friday | Saturday | Sunday |
| <b>Latent class: average counts/minute/day</b> |      |                                           |                 |         |           |          |        |          |        |
| <u>Overall:</u>                                |      |                                           |                 |         |           |          |        |          |        |
| Class 1 - Least active                         | 1756 | 323.5                                     | 326.5           | 316.4   | 328.3     | 320.2    | 336.0  | 325.5    | 311.0  |
| Class 2                                        | 1529 | 559.6                                     | 544.0           | 543.8   | 548.4     | 564.6    | 572.2  | 586.4    | 563.9  |
| Class 3                                        | 616  | 810.0                                     | 798.1           | 792.7   | 826.4     | 797.1    | 786.5  | 829.3    | 824.0  |
| Class 4 - Most active                          | 97   | 1132.9                                    | 1174.5          | 1098.7  | 1127.6    | 1309.4   | 1288.8 | 911.0    | 1040.0 |
| <u>By age:</u>                                 |      |                                           |                 |         |           |          |        |          |        |
| <u>6-11 years old</u>                          |      |                                           |                 |         |           |          |        |          |        |
| Class 1 - Least active                         | 863  | 471.0                                     | 461.8           | 453.8   | 467.7     | 468.8    | 472.2  | 503.0    | 482.0  |
| Class 2                                        | 630  | 746.5                                     | 712.8           | 713.0   | 744.9     | 742.0    | 743.9  | 798.3    | 775.4  |
| Class 3 - Most active                          | 95   | 1107.4                                    | 1131.0          | 1100.8  | 1080.6    | 1221.5   | 1219.5 | 912.9    | 1086.4 |
| <u>12-14 years old</u>                         |      |                                           |                 |         |           |          |        |          |        |
| Class 1 - Least active                         | 672  | 324.3                                     | 331.3           | 319.6   | 327.6     | 323.5    | 335.2  | 320.8    | 305.8  |
| Class 2                                        | 441  | 554.5                                     | 523.7           | 530.0   | 533.9     | 564.2    | 563.3  | 584.3    | 573.2  |
| Class 3 - Most active                          | 134  | 848.3                                     | 883.1           | 908.5   | 839.8     | 857.9    | 788.8  | 813.1    | 766.6  |
| <u>15-17 years old</u>                         |      |                                           |                 |         |           |          |        |          |        |
| Class 1 - Least active                         | 749  | 293.5                                     | 289.9           | 294.6   | 295.6     | 286.7    | 308.7  | 290.4    | 280.5  |
| Class 2                                        | 329  | 516.0                                     | 547.0           | 522.7   | 525.2     | 548.6    | 563.6  | 436.4    | 418.8  |
| Class 3 - Most active                          | 85   | 782.7                                     | 918.4           | 771.0   | 925.4     | 728.6    | 743.5  | 647.0    | 659.6  |
| <u>By gender:</u>                              |      |                                           |                 |         |           |          |        |          |        |
| <u>Boys</u>                                    |      |                                           |                 |         |           |          |        |          |        |
| Class 1 - Least active                         | 795  | 370.8                                     | 375.4           | 361.3   | 388.4     | 367.9    | 356.6  | 380.8    | 364.8  |
| Class 2                                        | 814  | 605.4                                     | 584.7           | 581.8   | 602.8     | 608.5    | 628.2  | 641.9    | 588.4  |
| Class 3                                        | 344  | 860.4                                     | 839.7           | 853.3   | 874.5     | 834.4    | 815.5  | 890.9    | 899.1  |
| Class 4 - Most active                          | 53   | 1147.0                                    | 1225.6          | 1139.3  | 1115.2    | 1275.3   | 1365.2 | 880.9    | 1016.1 |
| <u>Girls</u>                                   |      |                                           |                 |         |           |          |        |          |        |
| Class 1 - Least active                         | 1301 | 331.7                                     | 332.5           | 329.2   | 328.2     | 330.7    | 353.2  | 326.3    | 318.7  |
| Class 2                                        | 643  | 624.5                                     | 607.5           | 604.1   | 597.9     | 634.9    | 642.3  | 654.3    | 642.6  |
| Class 3 - Most active                          | 48   | 1055.9                                    | 1062.4          | 998.5   | 1156.1    | 1132.9   | 1001.4 | 946.1    | 1060.5 |
| <u>By school characteristics:</u>              |      |                                           |                 |         |           |          |        |          |        |
| <u>In school</u>                               |      |                                           |                 |         |           |          |        |          |        |
| Class 1 - Least active                         | 1321 | 316.0                                     | 313.8           | 309.4   | 320.3     | 316.3    | 328.4  | 320.4    | 305.3  |
| Class 2                                        | 1058 | 532.1                                     | 532.1           | 526.9   | 522.8     | 544.0    | 544.7  | 532.6    | 519.5  |
| Class 3                                        | 437  | 774.3                                     | 716.4           | 719.2   | 780.9     | 787.5    | 767.1  | 848.0    | 807.3  |
| Class 4 - Most active                          | 58   | 1138.1                                    | 1200.0          | 1140.4  | 1062.0    | 1269.8   | 1224.3 | 919.1    | 1138.8 |
| <u>Out school</u>                              |      |                                           |                 |         |           |          |        |          |        |

|                        |     |        |        |        |        |        |        |       |       |
|------------------------|-----|--------|--------|--------|--------|--------|--------|-------|-------|
| Class 1 - Least active | 514 | 390.5  | 403.1  | 391.8  | 396.0  | 383.1  | 400.4  | 391.2 | 371.0 |
| Class 2                | 283 | 720.6  | 691.1  | 721.2  | 736.8  | 698.1  | 713.2  | 738.1 | 715.1 |
| Class 3 - Most active  | 20  | 1124.0 | 1223.6 | 1204.3 | 1289.2 | 1475.7 | 1202.0 | 760.6 | 646.0 |

Latent class: percent of sedentary (0-<100 counts/minute) out of total wearing time per day

Overall:

|                          |      |      |      |      |      |      |      |      |      |
|--------------------------|------|------|------|------|------|------|------|------|------|
| Class 1 - Most sedentary | 538  | 68.8 | 69.3 | 70.2 | 70.4 | 69.8 | 66.9 | 67.3 | 66.4 |
| Class 2                  | 1405 | 57.3 | 57.9 | 58.5 | 58.1 | 57.5 | 57.2 | 54.1 | 56.7 |
| Class 3                  | 1461 | 45.2 | 46.5 | 45.8 | 45.7 | 45.6 | 44.2 | 44.1 | 44.1 |
| Class 4 -Least sedentary | 594  | 33.3 | 33.3 | 34.4 | 32.5 | 32.1 | 34.3 | 34.0 | 33.3 |

By age:

Age 6-11 years old

|                          |     |      |      |      |      |      |      |      |      |
|--------------------------|-----|------|------|------|------|------|------|------|------|
| Class 1 - Most sedentary | 120 | 60.5 | 61.3 | 63.8 | 61.9 | 60.8 | 61.9 | 51.9 | 57.5 |
| Class 2                  | 587 | 49.4 | 50.1 | 49.8 | 50.1 | 50.3 | 48.0 | 48.3 | 48.3 |
| Class 3                  | 640 | 39.3 | 40.6 | 40.4 | 39.7 | 38.8 | 40.2 | 37.6 | 37.1 |
| Class 4 -Least sedentary | 241 | 29.6 | 29.3 | 30.5 | 28.6 | 28.6 | 30.3 | 30.6 | 30.4 |

Age 12-14 years old

|                          |     |      |      |      |      |      |      |      |      |
|--------------------------|-----|------|------|------|------|------|------|------|------|
| Class 1 - Most sedentary | 103 | 71.3 | 72.2 | 71.6 | 71.9 | 72.1 | 68.8 | 68.7 | 70.2 |
| Class 2                  | 463 | 60.5 | 60.9 | 62.3 | 62.7 | 61.2 | 59.0 | 57.6 | 58.1 |
| Class 3                  | 518 | 49.8 | 50.7 | 50.7 | 49.8 | 49.2 | 50.0 | 48.3 | 49.9 |
| Class 4 -Least sedentary | 163 | 39.1 | 42.7 | 38.2 | 38.8 | 37.5 | 36.9 | 38.7 | 40.9 |

Age 15-17 years old

|                          |     |      |      |      |      |      |      |      |      |
|--------------------------|-----|------|------|------|------|------|------|------|------|
| Class 1 - Most sedentary | 204 | 70.9 | 71.6 | 72.8 | 73.1 | 73.3 | 68.0 | 69.4 | 67.4 |
| Class 2                  | 605 | 60.7 | 61.4 | 61.2 | 60.1 | 61.0 | 60.6 | 59.0 | 60.8 |
| Class 3                  | 290 | 49.0 | 49.6 | 49.2 | 49.3 | 48.1 | 47.2 | 47.2 | 52.2 |
| Class 4 -Least sedentary | 64  | 37.7 | 33.7 | 38.5 | 35.5 | 36.8 | 36.4 | 50.7 | 40.5 |

By gender:

Boys

|                          |     |      |      |      |      |      |      |      |      |
|--------------------------|-----|------|------|------|------|------|------|------|------|
| Class 1 - Most sedentary | 267 | 67.9 | 68.7 | 69.0 | 69.0 | 67.7 | 66.3 | 67.2 | 66.2 |
| Class 2                  | 743 | 55.2 | 55.8 | 55.8 | 56.0 | 55.8 | 55.5 | 51.5 | 54.5 |
| Class 3                  | 741 | 43.1 | 44.0 | 43.3 | 42.7 | 43.1 | 43.0 | 42.7 | 42.6 |
| Class 4 -Least sedentary | 255 | 31.0 | 31.0 | 31.3 | 30.8 | 30.2 | 31.4 | 31.8 | 32.1 |

Girls

|                          |     |      |      |      |      |      |      |      |      |
|--------------------------|-----|------|------|------|------|------|------|------|------|
| Class 1 - Most sedentary | 275 | 69.3 | 69.4 | 70.9 | 71.4 | 71.0 | 67.5 | 66.7 | 66.7 |
| Class 2                  | 693 | 58.8 | 59.4 | 60.3 | 59.9 | 58.7 | 57.9 | 56.5 | 57.7 |
| Class 3                  | 697 | 47.0 | 48.5 | 48.0 | 47.8 | 47.3 | 45.5 | 45.9 | 45.5 |
| Class 4 -Least sedentary | 327 | 35.3 | 35.9 | 37.0 | 34.6 | 34.6 | 36.2 | 34.8 | 34.7 |

By school characteristics:

In school

|                          |      |      |      |      |      |      |      |      |      |
|--------------------------|------|------|------|------|------|------|------|------|------|
| Class 1 - Most sedentary | 341  | 69.7 | 70.0 | 70.5 | 72.1 | 70.6 | 67.9 | 68.3 | 66.8 |
| Class 2                  | 978  | 59.3 | 60.1 | 61.0 | 59.9 | 59.6 | 58.6 | 55.7 | 58.2 |
| Class 3                  | 1058 | 48.2 | 49.2 | 49.2 | 48.6 | 48.3 | 47.6 | 46.9 | 47.2 |
| Class 4 -Least sedentary | 497  | 37.1 | 38.1 | 38.5 | 36.6 | 36.3 | 37.2 | 36.5 | 36.4 |

Out school

|                          |     |      |      |      |      |      |      |      |      |
|--------------------------|-----|------|------|------|------|------|------|------|------|
| Class 1 - Most sedentary | 239 | 63.7 | 63.7 | 64.4 | 63.6 | 64.9 | 62.9 | 61.8 | 64.0 |
| Class 2                  | 415 | 47.8 | 48.3 | 47.4 | 48.7 | 48.0 | 47.5 | 46.3 | 48.8 |
| Class 3 -Least sedentary | 163 | 33.4 | 34.0 | 34.9 | 32.4 | 32.6 | 33.8 | 33.5 | 33.9 |

Latent class: percent of light (100-2295 counts/minute) out of total wearing time per day

Overall:

|                                |      |      |      |      |      |      |      |      |      |
|--------------------------------|------|------|------|------|------|------|------|------|------|
| Class 1 - Least light activity | 508  | 27.9 | 27.6 | 26.4 | 26.5 | 26.4 | 29.9 | 29.8 | 30.4 |
| Class 2                        | 1379 | 38.1 | 37.0 | 37.0 | 37.3 | 37.4 | 38.3 | 41.3 | 39.8 |
| Class 3                        | 1572 | 48.8 | 48.0 | 48.2 | 48.1 | 48.6 | 49.0 | 50.1 | 50.1 |
| Class 4 - Most light activity  | 539  | 59.2 | 58.9 | 58.9 | 59.9 | 60.6 | 58.8 | 58.2 | 58.8 |

By age:

Age 6-11 years old

|                                |     |      |      |      |      |      |      |      |      |
|--------------------------------|-----|------|------|------|------|------|------|------|------|
| Class 1 - Least light activity | 228 | 37.9 | 37.5 | 35.9 | 36.8 | 37.1 | 37.6 | 43.3 | 40.4 |
| Class 2                        | 906 | 49.0 | 48.1 | 48.7 | 48.2 | 48.2 | 49.0 | 50.1 | 50.8 |
| Class 3 - Most light activity  | 454 | 59.2 | 58.9 | 58.4 | 59.6 | 60.5 | 58.7 | 59.1 | 59.2 |

Age 12-14 years old

|                                |     |      |      |      |      |      |      |      |      |
|--------------------------------|-----|------|------|------|------|------|------|------|------|
| Class 1 - Least light activity | 363 | 31.4 | 30.4 | 30.0 | 29.5 | 30.8 | 32.7 | 33.4 | 34.9 |
| Class 2                        | 662 | 42.3 | 41.5 | 40.8 | 41.5 | 41.8 | 42.5 | 45.3 | 42.9 |
| Class 3 - Most light activity  | 222 | 52.5 | 50.1 | 52.7 | 52.8 | 53.7 | 54.4 | 52.6 | 52.1 |

Age 15-17 years old

|                                |     |      |      |      |      |      |      |      |      |
|--------------------------------|-----|------|------|------|------|------|------|------|------|
| Class 1 - Least light activity | 409 | 28.8 | 28.4 | 26.8 | 26.6 | 27.2 | 30.5 | 31.5 | 31.4 |
| Class 2                        | 586 | 39.6 | 38.3 | 39.5 | 39.5 | 39.1 | 39.7 | 41.5 | 39.4 |
| Class 3 - Most light activity  | 168 | 52.8 | 52.6 | 52.1 | 54.4 | 54.7 | 53.9 | 48.5 | 51.2 |

By gender:

Boys

|                                |     |      |      |      |      |      |      |      |      |
|--------------------------------|-----|------|------|------|------|------|------|------|------|
| Class 1 - Least light activity | 247 | 27.8 | 27.1 | 26.3 | 26.9 | 26.7 | 29.9 | 29.3 | 29.8 |
| Class 2                        | 706 | 38.4 | 37.4 | 37.9 | 37.8 | 37.7 | 38.2 | 41.8 | 40.0 |
| Class 3                        | 808 | 49.1 | 48.6 | 48.9 | 48.4 | 48.9 | 48.8 | 49.8 | 50.1 |
| Class 4 - Most light activity  | 245 | 59.9 | 59.7 | 60.4 | 60.5 | 61.6 | 59.7 | 58.4 | 58.7 |

Girls

|                                |     |      |      |      |      |      |      |      |      |
|--------------------------------|-----|------|------|------|------|------|------|------|------|
| Class 1 - Least light activity | 252 | 27.8 | 27.6 | 26.1 | 25.8 | 26.2 | 29.7 | 30.3 | 31.0 |
| Class 2                        | 678 | 37.6 | 36.7 | 35.7 | 36.5 | 37.1 | 38.5 | 40.4 | 39.5 |
| Class 3                        | 759 | 48.4 | 47.1 | 47.1 | 47.7 | 47.9 | 49.1 | 50.2 | 50.1 |
| Class 4 - Most light activity  | 303 | 48.4 | 57.6 | 57.7 | 58.7 | 59.4 | 57.6 | 58.1 | 58.2 |

By school characteristics:

In school

|                                |      |      |      |      |      |      |      |      |      |
|--------------------------------|------|------|------|------|------|------|------|------|------|
| Class 1 - Least light activity | 468  | 28.4 | 27.9 | 27.5 | 26.4 | 27.1 | 29.9 | 30.4 | 31.4 |
| Class 2                        | 1061 | 38.3 | 37.4 | 36.5 | 37.6 | 37.7 | 38.8 | 41.9 | 40.3 |
| Class 3                        | 1042 | 48.2 | 46.9 | 47.2 | 47.6 | 47.9 | 48.5 | 50.1 | 50.0 |
| Class 4 - Most light activity  | 303  | 57.7 | 57.9 | 56.9 | 58.7 | 59.0 | 57.3 | 56.0 | 57.2 |

Out school

|                                |     |      |      |      |      |      |      |      |      |
|--------------------------------|-----|------|------|------|------|------|------|------|------|
| Class 1 - Least light activity | 266 | 33.5 | 32.5 | 33.3 | 32.9 | 32.6 | 33.6 | 36.3 | 34.1 |
| Class 2                        | 414 | 47.7 | 47.9 | 47.9 | 47.3 | 48.0 | 47.8 | 48.4 | 46.8 |
| Class 3 - Most light activity  | 137 | 59.5 | 58.9 | 57.8 | 60.2 | 60.6 | 59.6 | 60.1 | 59.4 |



|                       |     |     |     |     |     |     |     |     |     |
|-----------------------|-----|-----|-----|-----|-----|-----|-----|-----|-----|
| Class 2               | 743 | 3.0 | 3.1 | 2.9 | 3.2 | 3.1 | 3.1 | 3.1 | 2.6 |
| Class 3 - Most active | 232 | 6.0 | 5.9 | 6.3 | 6.0 | 6.8 | 6.2 | 4.7 | 5.3 |

By age:

Age 6-11 years old

|                        |      |     |     |     |     |     |     |     |     |
|------------------------|------|-----|-----|-----|-----|-----|-----|-----|-----|
| Class 1 - Least active | 1187 | 1.2 | 1.2 | 1.1 | 1.2 | 1.2 | 1.2 | 1.2 | 1.2 |
| Class 2                | 314  | 3.3 | 2.8 | 3.1 | 3.4 | 3.5 | 3.4 | 3.7 | 2.9 |
| Class 3 - Most active  | 87   | 6.2 | 6.2 | 5.9 | 6.6 | 7.1 | 6.4 | 5.0 | 6.3 |

Age 12-14 years old

|                       |      |     |     |     |     |     |     |     |     |
|-----------------------|------|-----|-----|-----|-----|-----|-----|-----|-----|
| Class 1 - Less active | 1082 | 1.0 | 0.9 | 1.0 | 1.0 | 1.0 | 1.0 | 0.8 | 0.9 |
| Class 2 - More active | 165  | 4.6 | 4.7 | 5.0 | 4.4 | 4.6 | 4.3 | 5.0 | 3.9 |

Age 15-17 years old

|                        |     |     |     |     |     |     |     |     |     |
|------------------------|-----|-----|-----|-----|-----|-----|-----|-----|-----|
| Class 1 - Least active | 992 | 0.7 | 0.7 | 0.7 | 0.8 | 0.7 | 0.7 | 0.4 | 0.5 |
| Class 2                | 104 | 3.8 | 6.4 | 3.9 | 5.0 | 3.7 | 3.6 | 1.1 | 2.0 |
| Class 3 - Most active  | 67  | 4.8 | 3.5 | 4.5 | 4.1 | 5.2 | 4.8 | 6.8 | 4.0 |

By gender:

Boys

|                        |      |     |     |     |     |     |     |     |     |
|------------------------|------|-----|-----|-----|-----|-----|-----|-----|-----|
| Class 1 - Least active | 1408 | 1.2 | 1.2 | 1.2 | 1.4 | 1.2 | 1.2 | 1.1 | 1.1 |
| Class 2                | 464  | 3.5 | 3.5 | 3.5 | 3.7 | 3.4 | 3.6 | 3.8 | 3.0 |
| Class 3 - Most active  | 134  | 6.3 | 6.0 | 6.0 | 6.7 | 8.2 | 6.7 | 5.0 | 5.2 |

Girls

|                        |      |     |     |     |     |     |     |     |     |
|------------------------|------|-----|-----|-----|-----|-----|-----|-----|-----|
| Class 1 - Least active | 1674 | 0.7 | 0.7 | 0.7 | 0.6 | 0.7 | 0.7 | 0.7 | 0.7 |
| Class 2                | 272  | 2.6 | 2.7 | 2.3 | 2.5 | 3.1 | 2.7 | 2.7 | 2.2 |
| Class 3 - Most active  | 46   | 5.7 | 7.3 | 7.1 | 5.7 | 5.6 | 4.7 | 3.5 | 5.9 |

By school characteristics:

In school

|                        |      |     |     |     |     |     |     |     |     |
|------------------------|------|-----|-----|-----|-----|-----|-----|-----|-----|
| Class 1 - Least active | 2263 | 0.9 | 0.9 | 0.9 | 0.9 | 0.9 | 0.9 | 0.8 | 0.8 |
| Class 2                | 482  | 3.2 | 3.0 | 2.8 | 3.4 | 3.3 | 3.4 | 3.5 | 2.8 |
| Class 3 - Most active  | 129  | 6.2 | 5.6 | 7.1 | 5.5 | 8.0 | 6.4 | 5.0 | 4.9 |

Out school

|                        |     |     |     |     |     |     |     |     |     |
|------------------------|-----|-----|-----|-----|-----|-----|-----|-----|-----|
| Class 1 - Least active | 671 | 1.0 | 0.9 | 1.0 | 1.1 | 1.0 | 1.1 | 1.1 | 1.0 |
| Class 2                | 83  | 3.5 | 6.8 | 3.0 | 3.7 | 2.0 | 3.3 | 1.8 | 3.5 |
| Class 3 - Most active  | 63  | 4.9 | 3.5 | 6.7 | 5.1 | 6.3 | 4.0 | 4.9 | 3.0 |

---
