# Supplementary material for: National youth sedentary behavior and physical activity daily patterns using latent class analysis applied to accelerometry
Source: PubMed Central journal article supplement (PMC4855777; doi:10.1186/s12966-016-0382-x), 2016-05-03
Supplement: 12966_2016_382_MOESM3_ESM.pdf [file 12966_2016_382_MOESM3_ESM.pdf]

Online Table 2: Weighted average physical activity and sedentary behavior in minutes/day by day of the week for each latent class derived from accelerometry, overall and by age, gender, and school characteristics, among youth 6-17 years; NHANES 2003-2006

|                                                                                                                | n    | Weighted Average Minutes/Day |         |           |          |        |          |        |
|----------------------------------------------------------------------------------------------------------------|------|------------------------------|---------|-----------|----------|--------|----------|--------|
|                                                                                                                |      | By Day of the Week           |         |           |          |        |          |        |
|                                                                                                                |      | Monday                       | Tuesday | Wednesday | Thursday | Friday | Saturday | Sunday |
| <b>Latent class: percent of sedentary behavior (0-&lt;100 counts/minute) out of total wearing time per day</b> |      |                              |         |           |          |        |          |        |
| <u>Overall:</u>                                                                                                |      |                              |         |           |          |        |          |        |
| Class 1 - Most sedentary                                                                                       | 538  | 564.3                        | 570.9   | 572.2     | 575.3    | 560.4  | 497.7    | 494.8  |
| Class 2                                                                                                        | 1405 | 474.8                        | 481.4   | 469.6     | 462.6    | 478.3  | 411.9    | 423.4  |
| Class 3                                                                                                        | 1461 | 373.9                        | 368.1   | 369.6     | 373.3    | 365.5  | 338.6    | 327.1  |
| Class 4 -Least sedentary                                                                                       | 594  | 267.2                        | 273.0   | 257.4     | 252.9    | 275.1  | 256.9    | 246.5  |
| <u>By age:</u>                                                                                                 |      |                              |         |           |          |        |          |        |
| <u>Age 6-11 years old</u>                                                                                      |      |                              |         |           |          |        |          |        |
| Class 1 - Most sedentary                                                                                       | 120  | 485.3                        | 508.6   | 488.7     | 469.8    | 502.0  | 384.6    | 422.4  |
| Class 2                                                                                                        | 587  | 402.5                        | 400.1   | 405.9     | 409.1    | 403.0  | 373.3    | 366.2  |
| Class 3                                                                                                        | 640  | 328.2                        | 320.3   | 318.3     | 314.7    | 330.3  | 285.1    | 275.4  |
| Class 4 -Least sedentary                                                                                       | 241  | 231.0                        | 242.1   | 223.2     | 220.0    | 240.6  | 228.1    | 223.4  |
| <u>Age 12-14 years old</u>                                                                                     |      |                              |         |           |          |        |          |        |
| Class 1 - Most sedentary                                                                                       | 103  | 601.6                        | 595.0   | 584.4     | 607.6    | 602.9  | 519.2    | 518.5  |
| Class 2                                                                                                        | 463  | 495.9                        | 512.8   | 506.5     | 495.7    | 493.2  | 430.8    | 428.3  |
| Class 3                                                                                                        | 518  | 417.0                        | 417.6   | 406.2     | 395.7    | 409.5  | 366.2    | 360.2  |
| Class 4 -Least sedentary                                                                                       | 163  | 323.6                        | 301.2   | 311.5     | 301.3    | 300.9  | 306.1    | 306.6  |
| <u>Age 15-17 years old</u>                                                                                     |      |                              |         |           |          |        |          |        |
| Class 1 - Most sedentary                                                                                       | 204  | 599.4                        | 597.8   | 587.3     | 604.6    | 561.1  | 507.4    | 494.0  |
| Class 2                                                                                                        | 605  | 504.5                        | 506.2   | 490.2     | 502.4    | 508.4  | 451.3    | 464.6  |
| Class 3                                                                                                        | 290  | 402.8                        | 406.3   | 408.6     | 398.5    | 391.9  | 367.2    | 382.8  |
| Class 4 -Least sedentary                                                                                       | 64   | 272.3                        | 304.8   | 287.0     | 289.7    | 284.8  | 382.3    | 294.7  |
| <u>By gender:</u>                                                                                              |      |                              |         |           |          |        |          |        |
| <u>Boys</u>                                                                                                    |      |                              |         |           |          |        |          |        |
| Class 1 - Most sedentary                                                                                       | 267  | 559.9                        | 549.9   | 553.2     | 539.8    | 556.6  | 507.2    | 502.8  |
| Class 2                                                                                                        | 743  | 461.5                        | 460.7   | 455.1     | 455.9    | 466.9  | 398.2    | 412.6  |
| Class 3                                                                                                        | 741  | 356.7                        | 349.7   | 349.0     | 353.2    | 355.3  | 330.5    | 325.0  |
| Class 4 -Least sedentary                                                                                       | 255  | 250.7                        | 251.0   | 243.9     | 234.3    | 249.9  | 237.5    | 236.0  |
| <u>Girls</u>                                                                                                   |      |                              |         |           |          |        |          |        |
| Class 1 - Most sedentary                                                                                       | 275  | 565.7                        | 583.4   | 580.6     | 589.9    | 567.8  | 486.0    | 490.8  |
| Class 2                                                                                                        | 693  | 485.5                        | 498.5   | 484.7     | 475.4    | 479.5  | 424.2    | 424.5  |
| Class 3                                                                                                        | 697  | 385.5                        | 381.3   | 381.0     | 383.8    | 373.2  | 347.2    | 329.8  |
| Class 4 -Least sedentary                                                                                       | 327  | 283.5                        | 291.4   | 275.3     | 273.6    | 293.5  | 265.5    | 253.3  |
| <u>By school characteristics:</u>                                                                              |      |                              |         |           |          |        |          |        |
| <u>In school</u>                                                                                               |      |                              |         |           |          |        |          |        |
| Class 1 - Most sedentary                                                                                       | 341  | 576.2                        | 593.7   | 589.4     | 586.9    | 574.7  | 502.2    | 492.9  |
| Class 2                                                                                                        | 978  | 501.5                        | 504.0   | 491.5     | 486.6    | 491.7  | 425.9    | 436.7  |

|                          |      |       |       |       |       |       |       |       |
|--------------------------|------|-------|-------|-------|-------|-------|-------|-------|
| Class 3                  | 1058 | 406.5 | 404.4 | 399.8 | 401.6 | 403.0 | 361.0 | 352.3 |
| Class 4 -Least sedentary | 497  | 306.8 | 307.9 | 297.6 | 292.5 | 304.5 | 275.7 | 272.8 |
| <u>Out school</u>        |      |       |       |       |       |       |       |       |
| Class 1 - Most sedentary | 239  | 493.0 | 497.6 | 480.9 | 510.1 | 513.4 | 456.2 | 475.1 |
| Class 2                  | 415  | 363.1 | 368.2 | 377.6 | 372.6 | 372.5 | 352.5 | 360.0 |
| Class 3 -Least sedentary | 163  | 267.5 | 282.6 | 249.1 | 249.2 | 265.4 | 259.1 | 251.6 |

Latent class: percent of light activity (100-2295 counts/minute) out of total wearing time per day

Overall:

|                                |      |       |       |       |       |       |       |       |
|--------------------------------|------|-------|-------|-------|-------|-------|-------|-------|
| Class 1 - Least light activity | 508  | 229.1 | 218.6 | 214.9 | 216.8 | 255.2 | 225.0 | 226.8 |
| Class 2                        | 1379 | 303.3 | 303.9 | 301.9 | 303.4 | 320.8 | 313.2 | 294.5 |
| Class 3                        | 1572 | 386.3 | 386.7 | 389.2 | 395.5 | 402.6 | 382.5 | 368.2 |
| Class 4 - Most light activity  | 539  | 462.1 | 464.7 | 468.4 | 469.9 | 470.8 | 440.3 | 427.1 |

By age:

Age 6-11 years old

|                                |     |       |       |       |       |       |       |       |
|--------------------------------|-----|-------|-------|-------|-------|-------|-------|-------|
| Class 1 - Least light activity | 228 | 304.1 | 294.0 | 297.1 | 291.0 | 314.2 | 326.2 | 298.0 |
| Class 2                        | 906 | 387.0 | 387.5 | 387.7 | 394.3 | 405.8 | 382.8 | 376.1 |
| Class 3 - Most light activity  | 454 | 467.0 | 460.6 | 467.8 | 467.5 | 469.0 | 444.2 | 429.9 |

Age 12-14 years old

|                                |     |       |       |       |       |       |       |       |
|--------------------------------|-----|-------|-------|-------|-------|-------|-------|-------|
| Class 1 - Least light activity | 363 | 246.4 | 246.1 | 240.4 | 251.8 | 275.9 | 252.8 | 251.3 |
| Class 2                        | 662 | 345.2 | 340.0 | 337.2 | 339.2 | 353.0 | 339.2 | 311.6 |
| Class 3 - Most light activity  | 222 | 384.8 | 414.2 | 419.9 | 427.1 | 444.8 | 415.5 | 390.6 |

Age 15-17 years old

|                                |     |       |       |       |       |       |       |       |
|--------------------------------|-----|-------|-------|-------|-------|-------|-------|-------|
| Class 1 - Least light activity | 409 | 233.6 | 219.9 | 216.7 | 223.0 | 258.9 | 236.7 | 233.4 |
| Class 2                        | 586 | 314.1 | 326.9 | 322.7 | 321.7 | 328.0 | 316.9 | 293.2 |
| Class 3 - Most light activity  | 168 | 415.4 | 417.0 | 437.3 | 446.7 | 433.0 | 377.4 | 374.9 |

By gender:

Boys

|                                |     |       |       |       |       |       |       |       |
|--------------------------------|-----|-------|-------|-------|-------|-------|-------|-------|
| Class 1 - Least light activity | 247 | 228.9 | 216.1 | 215.4 | 214.0 | 253.8 | 225.0 | 224.1 |
| Class 2                        | 706 | 309.6 | 311.3 | 308.5 | 307.5 | 321.5 | 320.6 | 302.0 |
| Class 3                        | 808 | 395.4 | 394.9 | 393.5 | 401.0 | 405.3 | 383.3 | 375.0 |
| Class 4 - Most light activity  | 245 | 471.8 | 481.0 | 474.2 | 472.2 | 478.0 | 439.2 | 428.7 |

Girls

|                                |     |       |       |       |       |       |       |       |
|--------------------------------|-----|-------|-------|-------|-------|-------|-------|-------|
| Class 1 - Least light activity | 252 | 228.7 | 217.0 | 209.9 | 220.1 | 253.8 | 227.6 | 228.0 |
| Class 2                        | 678 | 298.2 | 294.9 | 295.4 | 299.1 | 321.4 | 302.2 | 288.7 |
| Class 3                        | 759 | 373.5 | 375.0 | 382.7 | 388.3 | 397.1 | 380.9 | 360.4 |
| Class 4 - Most light activity  | 303 | 449.0 | 449.9 | 459.0 | 462.1 | 464.6 | 439.7 | 418.9 |

By school characteristics:

In school

|                                |      |       |       |       |       |       |       |       |
|--------------------------------|------|-------|-------|-------|-------|-------|-------|-------|
| Class 1 - Least light activity | 468  | 233.6 | 229.5 | 217.9 | 225.1 | 255.2 | 229.2 | 234.6 |
| Class 2                        | 1061 | 310.4 | 304.6 | 307.4 | 309.5 | 328.4 | 320.6 | 298.8 |
| Class 3                        | 1042 | 385.8 | 385.3 | 391.0 | 398.2 | 405.1 | 385.0 | 367.8 |
| Class 4 - Most light activity  | 303  | 454.3 | 450.9 | 464.3 | 462.2 | 460.8 | 420.2 | 422.0 |

Out school

|                                |     |       |       |       |       |       |       |       |
|--------------------------------|-----|-------|-------|-------|-------|-------|-------|-------|
| Class 1 - Least light activity | 266 | 252.5 | 259.1 | 250.5 | 251.3 | 272.5 | 267.8 | 248.7 |
| Class 2                        | 414 | 362.8 | 371.3 | 369.7 | 371.5 | 375.1 | 362.5 | 343.5 |
| Class 3 - Most light activity  | 137 | 455.2 | 468.7 | 455.7 | 456.1 | 464.9 | 467.8 | 439.1 |

Latent class: percent of moderate to vigorous physical activity (>=2296 counts/minute) out of total wearing time per day

Overall:

|                        |      |       |       |       |       |       |       |       |
|------------------------|------|-------|-------|-------|-------|-------|-------|-------|
| Class 1 - Least active | 2430 | 26.6  | 25.3  | 27.1  | 26.1  | 27.4  | 23.3  | 20.1  |
| Class 2                | 1243 | 62.5  | 60.1  | 60.1  | 63.3  | 66.5  | 59.2  | 54.9  |
| Class 3                | 162  | 85.3  | 126.5 | 125.5 | 90.9  | 69.9  | 53.0  | 52.0  |
| Class 4 - Most active  | 163  | 107.3 | 90.9  | 97.0  | 113.0 | 124.7 | 124.3 | 121.6 |

By age:

Age 6-11 years old

|                        |     |       |      |       |       |       |       |       |
|------------------------|-----|-------|------|-------|-------|-------|-------|-------|
| Class 1 - Least active | 886 | 33.3  | 32.2 | 33.5  | 33.0  | 35.5  | 33.6  | 29.5  |
| Class 2                | 586 | 65.5  | 65.3 | 68.6  | 70.0  | 70.9  | 65.7  | 61.4  |
| Class 3 - Most active  | 116 | 104.6 | 99.0 | 113.5 | 110.8 | 120.5 | 120.8 | 119.0 |

Age 12-14 years old

|                        |     |       |      |       |       |      |      |      |
|------------------------|-----|-------|------|-------|-------|------|------|------|
| Class 1 - Least active | 783 | 24.3  | 24.2 | 25.2  | 24.7  | 26.0 | 19.5 | 16.6 |
| Class 2                | 348 | 57.4  | 60.8 | 54.3  | 57.5  | 57.6 | 53.8 | 53.0 |
| Class 3 - Most active  | 116 | 113.2 | 98.8 | 102.3 | 109.6 | 99.6 | 88.0 | 71.7 |

Age 15-17 years old

|                        |     |      |      |      |      |      |      |       |
|------------------------|-----|------|------|------|------|------|------|-------|
| Class 1 - Least active | 903 | 24.1 | 23.4 | 24.6 | 22.7 | 25.0 | 17.9 | 14.0  |
| Class 2                | 195 | 91.7 | 65.0 | 78.7 | 78.0 | 72.3 | 48.8 | 32.0  |
| Class 3 - Most active  | 65  | 37.5 | 92.7 | 58.3 | 56.5 | 60.6 | 29.4 | 110.8 |

By gender:

Boys

|                        |      |       |       |       |       |       |       |       |
|------------------------|------|-------|-------|-------|-------|-------|-------|-------|
| Class 1 - Least active | 1091 | 33.7  | 30.5  | 35.5  | 32.5  | 33.5  | 30.8  | 25.8  |
| Class 2                | 679  | 70.9  | 66.2  | 67.6  | 68.8  | 74.3  | 66.6  | 64.0  |
| Class 3                | 123  | 79.4  | 132.7 | 127.1 | 97.6  | 70.1  | 49.1  | 34.8  |
| Class 4 - Most active  | 113  | 106.3 | 93.0  | 100.0 | 115.4 | 134.2 | 133.1 | 120.4 |

Girls

|                        |      |       |       |       |      |      |      |       |
|------------------------|------|-------|-------|-------|------|------|------|-------|
| Class 1 - Least active | 1437 | 22.5  | 23.5  | 22.3  | 22.6 | 25.3 | 18.9 | 16.8  |
| Class 2                | 514  | 56.3  | 54.0  | 55.4  | 61.5 | 60.8 | 54.1 | 49.0  |
| Class 3 - Most active  | 41   | 108.4 | 114.0 | 110.1 | 87.8 | 74.3 | 79.7 | 116.4 |

By school characteristics:

In school

|                        |      |      |       |       |       |       |       |       |
|------------------------|------|------|-------|-------|-------|-------|-------|-------|
| Class 1 - Least active | 1739 | 25.6 | 24.8  | 26.3  | 25.7  | 26.2  | 20.7  | 17.9  |
| Class 2                | 892  | 59.0 | 57.5  | 57.9  | 62.8  | 63.1  | 54.2  | 49.2  |
| Class 3                | 108  | 89.0 | 133.7 | 135.1 | 104.1 | 76.2  | 55.3  | 60.2  |
| Class 4 - Most active  | 135  | 96.1 | 77.5  | 89.2  | 97.5  | 114.8 | 121.3 | 110.7 |

Out school

|                        |     |       |       |       |       |       |       |       |
|------------------------|-----|-------|-------|-------|-------|-------|-------|-------|
| Class 1 - Least active | 559 | 26.9  | 26.7  | 26.8  | 26.6  | 30.4  | 28.1  | 21.9  |
| Class 2                | 234 | 71.5  | 75.1  | 71.6  | 66.0  | 68.5  | 59.3  | 62.2  |
| Class 3 - Most active  | 24  | 134.8 | 121.3 | 109.0 | 111.8 | 108.9 | 148.5 | 119.9 |

**Latent class: percent of vigorous physical activity (>=4012 counts/minute) out of total wearing time per day**

Overall:

|                        |      |      |      |      |      |      |      |      |
|------------------------|------|------|------|------|------|------|------|------|
| Class 1 - Least active | 3023 | 7.4  | 7.3  | 7.5  | 7.2  | 7.8  | 6.6  | 6.4  |
| Class 2                | 743  | 24.8 | 23.3 | 25.7 | 25.1 | 25.3 | 23.4 | 18.8 |
| Class 3 - Most active  | 232  | 49.0 | 51.7 | 47.7 | 54.6 | 50.6 | 37.4 | 38.9 |

By age:

Age 6-11 years old

|                        |      |      |      |      |      |      |      |      |
|------------------------|------|------|------|------|------|------|------|------|
| Class 1 - Least active | 1187 | 9.7  | 8.9  | 9.4  | 9.3  | 10.3 | 9.2  | 8.6  |
| Class 2                | 314  | 23.0 | 25.2 | 26.2 | 28.2 | 27.5 | 27.9 | 21.2 |
| Class 3 - Most active  | 87   | 51.0 | 47.9 | 53.6 | 58.1 | 53.3 | 39.5 | 46.8 |

Age 12-14 years old

|                       |      |      |      |      |      |      |      |      |
|-----------------------|------|------|------|------|------|------|------|------|
| Class 1 - Less active | 1082 | 7.8  | 8.4  | 8.4  | 8.4  | 8.1  | 6.4  | 6.7  |
| Class 2 - More active | 165  | 40.1 | 41.1 | 35.4 | 37.6 | 35.9 | 37.5 | 28.6 |

Age 15-17 years old

|                        |     |      |      |      |      |      |      |      |
|------------------------|-----|------|------|------|------|------|------|------|
| Class 1 - Least active | 992 | 6.0  | 6.0  | 6.4  | 5.8  | 6.1  | 3.2  | 4.0  |
| Class 2                | 104 | 51.1 | 33.0 | 39.2 | 29.7 | 29.8 | 8.8  | 14.9 |
| Class 3 - Most active  | 67  | 31.8 | 37.0 | 34.1 | 43.8 | 39.4 | 57.0 | 28.9 |

By gender:

Boys

|                        |      |      |      |      |      |      |      |      |
|------------------------|------|------|------|------|------|------|------|------|
| Class 1 - Least active | 1408 | 9.7  | 9.5  | 11.0 | 9.4  | 10.1 | 8.5  | 8.4  |
| Class 2                | 464  | 28.9 | 28.6 | 29.3 | 27.5 | 30.1 | 28.2 | 22.3 |
| Class 3 - Most active  | 134  | 50.3 | 50.5 | 53.4 | 65.7 | 56.2 | 38.8 | 37.3 |

Girls

|                        |      |      |      |      |      |      |      |      |
|------------------------|------|------|------|------|------|------|------|------|
| Class 1 - Least active | 1674 | 5.5  | 5.9  | 5.2  | 5.4  | 6.1  | 4.9  | 4.8  |
| Class 2                | 272  | 21.5 | 17.9 | 19.6 | 25.1 | 21.7 | 20.7 | 15.6 |
| Class 3 - Most active  | 46   | 55.9 | 55.9 | 44.8 | 46.8 | 37.7 | 27.9 | 43.7 |

By school characteristics:

In school

|                        |      |      |      |      |      |      |      |      |
|------------------------|------|------|------|------|------|------|------|------|
| Class 1 - Least active | 2263 | 7.3  | 7.6  | 7.6  | 7.4  | 7.8  | 6.0  | 6.1  |
| Class 2                | 482  | 25.0 | 23.5 | 27.6 | 27.1 | 28.3 | 26.3 | 20.9 |
| Class 3 - Most active  | 129  | 46.8 | 59.4 | 45.9 | 65.6 | 53.5 | 39.8 | 36.6 |

Out school

|                        |     |      |      |      |      |      |      |      |
|------------------------|-----|------|------|------|------|------|------|------|
| Class 1 - Least active | 671 | 7.3  | 8.0  | 8.9  | 7.9  | 9.0  | 8.0  | 7.1  |
| Class 2                | 83  | 53.2 | 25.0 | 27.0 | 15.7 | 25.5 | 13.5 | 24.1 |
| Class 3 - Most active  | 63  | 29.2 | 50.6 | 38.3 | 49.7 | 31.7 | 37.7 | 21.4 |

---
